# Supplementary material for: Ex vivo and in vivo CRISPR/Cas9 screenings identify the roles of protein N-glycosylation in regulating T-cell activation and functions
Source: eLife. 2026 Mar 20;14:RP108724. doi: 10.7554/eLife.108724 (PMC13004595; doi:10.7554/eLife.108724)
Supplement: Supplementary file 3. [file elife-108724-supp3.xlsx]

## Sheet: 2nd_3rd_Sabatini_small_library_
sgRNA	seq	gene
1	CCAGTTAAAGCAACAAGTGA	Mcur1
2	GGAACTCCGCAGCCGGAGGA	Mcur1
3	ACGAGCAGGAGGAACAACAG	Mcur1
4	GGTGGGACCAACTGTAGCAG	Megf10
5	GGGGTCTTCCAGGTTCAGGG	Megf10
6	GGGACAGTTACCTTTCCCAG	Megf10
7	CTGCAGCTGCCAGAACGGGG	Megf10
8	GCTGTGCACACACTGCGGGC	Megf10
9	TCGGCAGGGAATGTCACCGG	Megf9
10	GGGAGCCGCGGTCTTAGGGA	Megf9
11	GTGTCCGTCCTCCGAAGGGG	Megf9
12	GGCTGTGGAAGCGGCTGCGG	Megf9
13	AAGAGGAGGAATGATCTCCG	Megf9
14	CATGCGGGATACACATACTG	Memo1
15	GGAGAGTGCACATCGAGACA	Memo1
16	CCTGGCGCCCTTACCTGAGG	Memo1
17	ATATGTGGAAGACATCCCAT	Memo1
18	TTCCCGGCAGACCACTCGGT	Memo1
19	GGGAGCGGCAGAAGTTACGG	Mettl14
20	GCTCCCGGATCTCCTGCAGG	Mettl14
21	GGATGAACTGGAAATGCAGC	Mettl14
22	TAACAGATGATGAGATGCGC	Mettl3
23	GCGAGAGATTGCAGCGGCGA	Mettl3
24	GGGCGGCAAATTTCTGGAGA	Mettl3
25	GGAGAGCGCGACGGAGACGG	Adrb3
26	AGAGCATCACAAGGAGGGGA	Adrb3
27	GTGGGTTGCCAGGAGTACCA	Adrb3
28	GTCTGTTCTCAGCAGTGGGT	Mgat1
29	CCAATGATCAGAAGGAGCTG	Mgat1
30	GGGGTGCCAGGTGCACACGC	Mgat1
31	GTTCCGCATCTACAAACGGA	Mgat2
32	GCTAATCCTGACGCTCGTGG	Mgat2
33	CCAGAGGACGAAGCCGCAGG	Mgat2
34	CCACCAGCACCAGCTCCCCG	Mgat2
35	GCAGGAAGGATATGAGGCAC	Mgat3
36	GGGGTGTCCGCAATAGGTCG	Mgat3
37	CAGTTGCGGGGTGCCCACGG	Mgat3
38	TCCACTGCCAATCTGTACGG	Mgat4a
39	GAAACACTGCGACAGACAGA	Mgat4a
40	GGGGAAGATTCAGAAACTCA	Mgat4a
41	GCAGAGCCAGGAACTCGCGC	Mgat4b
42	GGGGAGATGAGGCTCCGCAA	Mgat4b
43	AGAAGTCAGGGTAGAAGTGA	Mgat4b
44	GGGGTTATCAGGGATGTCAA	Mgat4c
45	GTTGGTGTAGAAACTCGCTG	Mgat4c
46	TGAATACTGGAACAGAGGAC	Mgat4c
47	GCGGAGACAGCATTCAGCGG	Mgat5
48	GGTACTGGAGCCATAAACAG	Mgat5
49	AGAGGAGAACAGGGACGTGG	Mgat5
50	TGGCAAGCTCGAGTCAAAGG	Mgat5
51	TCTCAAGCGACACCAAGCTG	Mgat5
52	CTGCTACGCAGACTATGGAG	Mgat5
53	AGTACCTGGCACAGAAGCTG	Mgat5b
54	TAGATGAGGTCAAAAGGCAG	Mgat5b
55	CAAGGCCAGCAACATGGCGG	Mgat5b
56	ACGGAGCTTCGAGAGTCCGG	Mib1
57	AAGTGTGTGAAACCTAACGT	Adsl
58	GAAGATCAAGATGGAGGCAA	Mib1
59	GGTGGTGTGGGACAACGGCA	Mib1
60	GGCAAACCTGAAGGAGATGG	Adsl
61	GCTGTGGTCAAGCAGGAAGG	Adsl
62	ACAGTCGCCGTTGGGCAGGG	Adss
63	GGAGCGCAGTGGGGCGACGA	Adss
64	GGATTGGCTCAATCAGACGA	Mid1
65	GGGCGACGAGGGCAAAGGGA	Adss
66	GAAGCAGAGGCTATGTGCGC	Mid1
67	GTGAGAGACCAGGATTCGGT	Mid1
68	GCAGAGAACCTTCTCGGCAG	Mid1
69	GCTCTTCTCTAATCGCGGGA	Mid1
70	GAAGATGGAAACACTGGAGT	Mid1
71	GTTGACGCTCGTGCCCACGG	Midn
72	CATGAGGCCAGCTTCCACCG	Midn
73	ACAGGGTGAAGACACTGGGG	Midn
74	GGGGCACCGACAGGTCGTAG	Midn
75	CCAACGCCTCAAAGTACCCA	Midn
76	GAAGGAAAAGAAGATGCGGC	Adss
77	GGATGAAGCTCAACAAAAGG	Mina
78	AGAGTCTCTTCAGATCTGAG	Mina
79	GGGAAATGGAACGGAGACGA	Mina
80	AGGAGAAGAGGAGGAATCCG	Mina
81	TGTCAAAGGATGAGCTGTGG	Mina
82	CAGAGCAGGCTGTGACTGGG	AF366264
83	AGCCTGATTTACCGGAAACA	AF366264
84	CGAAAATACCACGATGAAAG	AF366264
85	CAGGCCAGGCACCAAGGCGC	Mob4
86	CCTTCATCTTGGCCTTCAGG	Mob4
87	GTGCTGAGGCGGAACAGGCC	Mob4
88	TCTGAGTACAGGTATCTGGA	Mob4
89	ACTGCGGGACCACCTGCGGG	Mocs1
90	GAGAATCATTGGGGCCGCAG	Mocs1
91	TAGGTCTCGAGGGCTCCCCG	Mocs1
92	GACCCACTGAAGGACCGCGA	Mogat2
93	GGAAGGAGAAGACCCACTGA	Mogat2
94	ACTGGAAGACACCTCTGCCG	Mogat2
95	GAACAGGGACACCAAAGGGA	Mogs
96	GGACAGTTGAAGTCCATCAG	Mogs
97	TTGGCGGCAGAAGTGTGAGG	Mogs
98	TTGAAGGGAACAATATGCAG	Morf4l1
99	GCCCTCACACGGCTTTCCGG	Morf4l1
100	GAGGGAGCTCCTTCAGGAAC	Morf4l1
101	CGGGTCCCAGGAGTTCCCAG	Mov10
102	AAGGAAACGGGCAATCCCGG	Mov10
103	TGGGGTTCTTAAGGAAACCG	Mov10
104	AAGCCGAGGCCTCCACACGG	Mpdz
105	GCACAGACCGGATGAAGTGG	Mpdz
106	AAAGCAAGCTGAAAGAACGC	Mpdz
107	GGAGGATGAGGACGACGCGG	Mpnd
108	GCAGTGTGTGGCCCAGGCGC	Mpnd
109	GCTCCAAGGAACCCTTCCCA	Mpnd
110	CATGATCTCACAGCAGCTGG	Mpv17
111	AAAGCAGCCTAGGAAACATG	Mpv17
112	GCGAGCATACCAGAGAGCCC	Mpv17
113	GGAGGATTTTGAGACCGCCG	Mroh2a
114	GCAGCCGGCCCAGCAAGCCA	Mroh2a
115	GGAGATCATCCAGCAGGAAG	Mroh2a
116	GCAGATGCGGGATATCACAG	Mroh2a
117	GACAAACCTTTTCCAAGGAG	Mroh2a
118	GAGGTCGATCAGCTCTGCTG	Afp
119	GCTGAGCTGGCAGCACGTGG	Afp
120	CTAGAGAGCATCCATTGCAA	Afp
121	GGCCTGGAACTAAAATGCCC	Mrpl3
122	ACAGCAAGAGTAGTACTTGG	Mrpl3
123	CAGCAGCCTCCAACCCGGCA	Mrpl3
124	GCTAGCTCTGTGAGGATGGA	Mrpl32
125	GAGGATGGATGGTCTCTGGA	Mrpl32
126	TGGAGCGGTCCGGGACGCAC	Mrpl32
127	CATGGGGATGAGATCCCAGA	Mrpl40
128	ACCTCTGCGGAAGAAGAAGA	Mrpl40
129	GGCTACACTCACCAGCTCCG	Mrpl40
130	GGTGGAGGTAACCATGGCGG	Mrpl53
131	GCGGCGGCTTTGGCTCGGCT	Mrpl53
132	CTGCCCGTTTGAGAAGAACG	Mrpl53
133	TCAGCAGTGCCAGTATGAAG	Mrps10
134	AATTCAGACACGAGCCGCCA	Mrps10
135	AACACATCAAGGAACCGATG	Mrps10
136	GCAGAACACTGAAAGGGAAG	Mrps11
137	CCAGCTAAGAATATCCACAC	Mrps11
138	AGAGTCGTAGTGAAAGGCAT	Mrps11
139	GCTGCTGCGGACCTTCCGGC	Mrps14
140	GGACTCCAGAAAGTAGCCCG	Mrps14
141	AGCGACGCTTAACACCACGT	Mrps14
142	GAAGCTCTGGTACCAGCGGT	Mrps30
143	AGGGCGGCGAGGTCGAGCGA	Mrps30
144	CAAGATGCAGTCGCACACGG	Mrps30
145	GGAGGCCCGAGAAAGGGCGA	Mrps31
146	GATTTGAGGAGATGATACAG	Mrps31
147	TGGAAACCGGGACGTCTCGG	Mrps31
148	GGGTTTTACCTGCACGACCC	Mrps36
149	GAAATTGCAGAGGAGTGGGA	Mrps36
150	ATAATTTCTGCAGTGTCTGG	Mrps36
151	GAAGCAGAACCTGATAGAAG	Mrto4
152	CCCACAGCTTCGGAAATGTG	Mrto4
153	CAGGATACGGGCCTGCTCTG	Mrto4
154	GGCTCTGGACAACCAGACGG	Mslnl
155	GCAGGTTCCTCAGCACACTG	Mslnl
156	GGAGTAGAGGTAGACCAGCG	Mslnl
157	AGGGACTGGCCTCGAACCAG	Msto1
158	ACTGCAGCGTGAGCACCTCG	Msto1
159	CAGGTACTTGGAAGAGCTGG	Msto1
160	GGAGCTGGTGCAGGAGCTCG	Mtch1
161	GGTGTAGCTCCGGATGGCCA	Mtch1
162	GCACATTGGTCCCAAGGGTG	Mtch1
163	GGACACAGAAGACCTAGAAA	Mtdh
164	GCCTCCTCCCGTTTGCGGGG	Mtdh
165	AATCTTACTGTCAATGGAGG	Mtdh
166	GGAGCAGGTGGAGGAGCGGA	Mtf1
167	TGGGAGAACAGAACTTACAG	Mtf1
168	GTCCTGTTCTATGAGAACAG	Mtf1
169	AGAGTAAACAGATCCAGCAG	Mtif3
170	GGAGCTTTAGCCGCTCCTGG	Mtif3
171	TTCAAGTCACGATAAAGAGG	Mtif3
172	GAGCGAAGAACAGTCTTCGG	Mtpap
173	AATGTATCAAAACAGTCCGC	Mtpap
174	GATAATGGCTGCTCGCGGCG	Mtpap
175	TGAGGTGACAATCCCCGGGG	Ago1
176	AGGAAAACCGCAAGACAGCG	Mttp
177	GGAAAGCAGAGCGGAGACAG	Mttp
178	CATAGGGAAGGACAACCTGG	Mttp
179	TCTGATGGCTAGCAGGGCGG	Ago1
180	AGTGAAGGATGACATGACGG	Ago1
181	TTTTGGCCTATCAGAAGCAG	Mtx2
182	GTTTCTAGCTGTATCTCCAG	Mtx2
183	GCGTTCGTCTCCCAGATCGC	Mtx2
184	GGGAGGAACAGAATATGTGG	Muc15
185	GAATGTTCGGAGACCTGTAA	Muc15
186	TGTCATCATAAAGGCGCCGA	Muc15
187	GCAGACGATCGAGGCCGCGG	Agpat2
188	GGCAGTGCTGAAGTCAACCA	Mybbp1a
189	AGAAGGAGAAGAAGCTCCGA	Mybbp1a
190	GTTACACGGAGCTGACACAG	Mybbp1a
191	GTCTGCCTGCTGCGCCACGG	Agpat2
192	GCAGCCTACCCATCATGTCC	Agpat2
193	GTTGGCAGACCCAAAACTGG	Mybpc1
194	GTACTCAGCCATGACAACCG	Mybpc1
195	AAAAGAAACAAAGCTCCAGG	Mybpc1
196	GTAGCGACCGCAACATAGGA	Myc
197	GAAGGCCGTGGAATCGGACG	Myc
198	GCTGTACGGAGTCGTAGTCG	Myc
199	GAACCCTCGGACGCCCGTGG	Myd88
200	CAGGTGTCGCCGCATGGTGG	Myd88
201	CCTGTCCTCAGGACAAACGC	Myd88
202	GAGGTGGTGGACGGCTACCG	Myh3
203	AGAGGTGACAGAGAGAGCCG	Myh3
204	GCTGAGTGAGCGGCTGGAGG	Myh3
205	TAGGTTGGGCAGGTTCACGG	Agpat9
206	GCTGATCCCAATGAAAGCCA	Agpat9
207	GGGGATCATTCAGAGAGCCA	Agpat9
208	GGAAACCATGGCCAAAATGG	Myo1b
209	TAGAAGACCTAAGGAAGCAG	Myo1b
210	AAAGGATCTTCCACTTGTGG	Myo1b
211	CTACCTCAGACACTCTCCAG	Agr2
212	CAAGTGATGAATGACCATCA	Agr2
213	AAGGTTCATAAGCGTAGAGC	Agr2
214	CAAGCTCTGCACACAGGTGG	Nab1
215	CAGGAGAGGAGACTCACGGC	Nab1
216	GCAGCCTCTCATACCCGGCC	Nab1
217	GGAACTTCCCGAATAATGAA	Naip1
218	GCTGGAACCTGTACAACAAG	Naip1
219	TGTGCATACAAACAGGGTCA	Naip1
220	GGCAAAAGTTGAAGAAGAGG	Nap1l3
221	GTCATTTGAACCGAAAGAAG	Nap1l3
222	AGTAGCAGTAGCGGTAGCAG	Nap1l3
223	AGAAGGAGTGCATGTAGAAG	Nasp
224	AGAGGACAGAGAAAATGACA	Nasp
225	TCTGCCGAGGTAGAAGGAGC	Nasp
226	AAAATAGCGAGCCTTGGCAG	Nbas
227	TCTGCGCTCCACAACTCCAG	Nbas
228	CTGGTATCAGAGCAGAGCAG	Nbas
229	TATAACAGCACACTCCAGGA	Ncapg2
230	GGGCAGATGTGTGTCGGCTG	Ncapg2
231	GAAGAAAGTCACAGGGGAGC	Ncapg2
232	GCAGTCCAGACTTGTAACAT	Ncbp1
233	TGTGCTGCAGAGCTTCACAG	Ncbp1
234	GATGCTGTCAAAGGCAAGGT	Ncbp1
235	ATACAGCAGCGTCCAAATGG	Nckipsd
236	CAAGATGCTCAGAACTGGGC	Nckipsd
237	GCTGCTCGTCGAGGCTGTGG	Nckipsd
238	TGAGTTGGAGCAGTAAACTG	Ncoa6
239	GCTGCCAAAAGGATAAGGAG	Ncoa6
240	AGTTTGGTTAACCGTTGGGG	Ncoa6
241	TCGGAAGCCGGACCCCGAGG	Ndfip2
242	GGATGGATCACCACCAGCTG	Ndfip2
243	GGGGACTGGTCGCTACCAGG	Ndfip2
244	AAGAGGAAGACTGTACGCCA	Ndfip2
245	GATGTAGAGCAGCTCAGAGT	Ndfip2
246	GAAGCAATGGAGAAGGCCCG	Ndor1
247	GAAGGGCTGTAACTCTGATG	Ndor1
248	TATGGCTACAGAACTTCTGG	Ndor1
249	GGCCTTCGTCAAGTAGGTGA	Ndufb10
250	GCACTCGACGGTACTGTCGG	Ndufb10
251	CTACCAGCAGAACTGTGCCA	Ndufb10
252	CGTAAGAAGGGAGAGCGCGG	Ndufs3
253	CTACCTCAACATAGCCAGTG	Ndufs3
254	CACACTAAGGAACATGGCGG	Ndufs3
255	TGACTGGATGAACAAGGTGA	Ndufv1
256	CTGAAAGGTGCCCTGAGACG	Ndufv1
257	GGGTGACTGGTACAAGACAA	Ndufv1
258	GTCAACGAGAGCCGCTACGG	Necab2
259	GAGGAGTAGGGCCTCCGTAG	Necab2
260	GGCGGGCGAGATGTGCGAGC	Necab2
261	CGAGATGGTGAACCACGAGA	Nefm
262	GCTGCGCGCCACCCTCGAGA	Nefm
263	GCGGAGCAATCACGAAGAGG	Nefm
264	CTAGCTGGGAAAATCAGGGA	Nek2
265	AAGATTCGGAGGAAGAGCGA	Nek2
266	GTAATGGAATACTGTGAGGG	Nek2
267	GATGTTATCGATGACCGCGG	Nelfa
268	GCAGCTGAAGAGAAGTGCTG	Nelfa
269	AGTGGTAGAAAAGCCCACCA	Nelfa
270	GGAGCGCTGGGTTCCTCAGG	Nelfa
271	TGGGCGCCACGGACGAGCTG	Nelfa
272	GGCAGGGCCGACTGCAGGGA	Nelfb
273	GATGCCATCCCTACAACCAG	Nelfb
274	GGAGAAGCCTCAGCACATGA	Nelfb
275	GGAAGCTCCAAAGACAGACA	AI317395
276	GTCTGGCACCATGATTGGCG	AI317395
277	GGGAGATATGGCCATTCCAG	AI317395
278	GCCACCTGCTCAGAAGCCGG	AI429214
279	ATGGATTGCAGAGACCTCAG	AI429214
280	ACAGAAAAGAGAAGATGAGG	Nexn
281	TGACGTTTCGCAAAAGGCAG	Nexn
282	AAAACGAAAAGCAGAGGAGG	Nexn
283	GAGGACCTGGACAGAGAAGA	Nexn
284	TGCATAGGATGATGAAACAG	Nexn
285	GGGAAGCTCCGGCTTTGGGC	AI429214
286	GGTCTCGACTGGGCTCTCAG	AI429214
287	GGAAAACCTAGACCCCGTCG	Nfasc
288	AGGGCGACCAGACCGACCCA	Nfasc
289	GGAGACCATCAACCTGGAGT	Nfasc
290	GCACCTGGCAGTAGAAGCCC	Nfkbib
291	GAGGCGGGCAAGGATGGGGT	Nfkbib
292	GGATGACAGCTACATGGAGT	Nfkbib
293	CAGAAACAGTACCTGGCCAG	Nfu1
294	TGGCACTGAAGTGATGGCGG	Nfu1
295	TATTCCAGAAGTGGAAGGTG	Nfu1
296	GTTATCAGTTCCTCGAGGGG	Nhej1
297	GAGGCGTGTGCTGTTGGTGA	Nhej1
298	TGATAACCAGCCAGAAGAGC	Nhej1
299	GCATTTGATTCATCCTCTGA	Nhej1
300	ATCCAGGCCTACCAGGAGAG	Nhej1
301	TGTGGATGTCTTACCTTCAT	Nhp2l1
302	TGTCTTCGCACAGCAGAGGG	Nhp2l1
303	TTGGAGCGCACAAATACGTA	Nhp2l1
304	GACATTCTTACCTCAAGGAA	Nipal1
305	ACTAGAGCCAATGAAAACGC	Nipal1
306	GCACGAAGCCCGGGAAGAGT	Nipal1
307	TGGTATTTCCCAGGGCAAGG	Nipal1
308	ATGAGCGCTTGAATATTCAC	Nipal1
309	GAGGAGGAGGAAGACCCGGA	Nkx6-1
310	GGGCTCAGGCTGCTGAAGCG	Nkx6-1
311	AAGTAGAGCCCGGGCGGCGG	Nkx6-1
312	GACACAGGCCAGGACTGGAG	Nkx6-3
313	CCATGGAGTCCAACCTGCAG	Nkx6-3
314	CAGGATGTCAGTGATTCCAT	Nkx6-3
315	GGACTCCAGCGTCTTCCCCA	Nle1
316	GAGATCCCAGAAGCGCACAG	Nle1
317	GTACAGTTCCAGGATGAGGG	Nle1
318	GAATCAACTCAAAGAGCACG	Nlrp4f
319	CCAAGATAGGAAGAGAGCCC	Nlrp4f
320	CATGGTGTTCCTGAAAGGCA	Nlrp4f
321	AGTAAAGTTGACATCAGCCA	Nmd3
322	AAAGAAATGGAGACCTGCTT	Nmd3
323	GTTGTTCAGTCCCAAATGTG	Nmd3
324	TATACGGTACAGACGAGCTC	Nme5
325	AAAAGTTACTACAGTGCTCG	Nme5
326	CATCTGGCTTGATAAGGGCT	Nme5
327	GGGACCCGCCAAAACCATGG	Nmt1
328	GAAGCTCTACCGACTGCCAG	Nmt1
329	GGTGAAGTGGTAAACACCCA	Nmt1
330	CAGGCCTACTCACCACACCA	Nmt1
331	GAAGCTCTGCAAGAAAATGC	Nobox
332	GAGTCAGGCCAAGCCACCGC	Nobox
333	GGCAGGGCAGAATCCTGCAG	Nobox
334	AAGAGCGTCAGAGCAAGAGG	Nol3
335	AATGAATCCAGAACAAGAGC	Nol3
336	GGCATGAAGGGTCATAGCTG	Nol3
337	CGAGCCCGACTTCCAAGAAG	Nol3
338	GAAACGGCTGCGGCTGGCCG	Nom1
339	GATGTAAACTCGAAAAGGAG	Nom1
340	GATGCTATCTATAGAGATGG	Nom1
341	GCAGAGACATAGAAAGAAGG	Aifm1
342	AGAAAGGATCACCTTCGACG	Nomo1
343	GGGATTTACAATCTCTCCAG	Nomo1
344	AAAAGGCTTGCTCAAACCGG	Nomo1
345	CCAATATTACCTCAACGAGC	Nop10
346	CAACCGCGTCCTGTCCTCTG	Nop10
347	TGAGCAGAAATTTGACCCTA	Nop10
348	AGACACTGCAATTCAGACAG	Aifm1
349	GTTGAGTTGGCCAAGACTGG	Aifm1
350	GGAAGAACAGGTAGTAGAAG	Nop58
351	TTAGCATCAGCGACAGCCAG	Nop58
352	TACACCAGCTGAAGTAGAGG	Nop58
353	GTGGAAAGACAAGGCAGCGG	Nos3
354	CAGGAGCCTGGGCCACCCTG	Nos3
355	GGTGCTGGTCGGGTTGGGGA	Nos3
356	GAAGGGATGCCACTCCAGGA	Nox1
357	GAATTCCCTGGAACAAGAGA	Nox1
358	CAGAAGAAGCCAACAGGCCA	Nox1
359	GTGCAGCTGACAGGGATCGG	Npc2
360	GTCAGGCTCAGGAATAGGGA	Npc2
361	GTCCCAGAACAGCACGGCCT	Npc2
362	ACTGGCACTGAAGGAGAAGG	Npdc1
363	AAGCTCACCTACACCAGCAG	Npdc1
364	TGAAGTGGGCCCCTTAGCTG	Npdc1
365	TTACCGAAAAGGTAGTTCTG	Npm1
366	ACCATCAACACCGAGATCAA	Npm1
367	AGATGAGTTACACATCGTAG	Npm1
368	GATCAATAAGCCAAGAGCTG	Nptn
369	AGAAAGGCCAAAGTGGGGCA	Nptn
370	GAAGAGGAAGAGGCCAGATG	Nptn
371	AAGAATTGTCACCAGTGAAG	Nptn
372	GAAGTGAAAGTGGAGCCCTA	Npy2r
373	CCAGGGCACACTACTCCTAG	Npy2r
374	ACTGGTTCTGAAGATGGGCC	Npy2r
375	GCTGTTGGCCAGGAACGGCA	Npy4r
376	GAGAGGGGCCAAGAAATGAG	Npy4r
377	GATGACCACAATCCCCAGGT	Npy4r
378	GGAACGCTGAACCAGTATAG	Nqo2
379	ATGGATAGGGTGCTGTGCCG	Nqo2
380	GAAGTGGCCACAGGAAGTAC	Nqo2
381	TAATAGGCTGAAACAAGCCA	Nr2c2
382	AGAACTGGCAGCGGTTACGG	Nr2c2
383	ACATTTGTGGCAGACAAAGA	Nr2c2
384	GACAGATGAGGAGAAAGCAA	Aip
385	ATAGATGACAGCCGAACACG	Aip
386	GGGCAACCGGTTGTACCGTG	Aip
387	CAGATTCTTGAGGCAGGCGA	Aip
388	CCGAACACGAGGCAAGCCCA	Aip
389	ACTTCTTGCAGCAACACCTG	Nrsn1
390	GGACTGCACTGCCTCTATCT	Nrsn1
391	ATCCTCATACTCCCAGATAG	Nrsn1
392	GCGATGTCTGGCGACAGCAG	Nsmce4a
393	GGTACTGATGGCGGATCTGG	Nsmce4a
394	TTGGAGGCCGAGTACGACCA	Nsmce4a
395	GGAGACCTAAGAATGGCCGA	Nt5c3
396	ATCTGTGGTCTCATTAAAGG	Nt5c3
397	AGTGATAAACTCCAGCCTGC	Nt5c3
398	GAGTGGCCGGTCCTACCATG	Ak2
399	GAGTGTGGTAGGCCTCCAGG	Ak2
400	CGGTTCGGAAGCCAACACGT	Ak2
401	TCTCCACAGGTAATATCCGG	Ntng1
402	GTTGTCATACAAACACGAAG	Ntng1
403	ATTGCACAGAAGGACTCTGG	Ntng1
404	GAAAAGCAGTGAGTGCCAAG	Ntsr2
405	GGCTGAGCACGTGGTAGCGC	Ntsr2
406	GACAGAAGCACGAAATGGAG	Ntsr2
407	ACCATCACAAACACAACCTG	Nuak2
408	GGGCAAGGGCACCTACGGGA	Nuak2
409	GTCATGGAGTATGCCAGCCG	Nuak2
410	GGAAAACCCTGATGAGGCCG	Nubp2
411	GGGGTCATAGAGAACATGAG	Nubp2
412	AGAACCCGGGAACCTGGCCG	Nubp2
413	GGTTTTCTTGCAGTCCAAGG	Nubpl
414	AGTGAACCTTGCTCTTGCGC	Nubpl
415	GTGGACATGCCACCAGGAAC	Nubpl
416	GTCTCTGTGGCCCTTAGCAG	Nudcd3
417	GCAAGACTACACCGACCTGG	Nudcd3
418	TAGCAGTGGCACCATCCGAG	Nudcd3
419	GCAAGGTTGGCGAGTACTGG	Nudcd3
420	AAATTAGCAAAACCCGCTGG	Nup43
421	GGAAACTTGGATTCTGACGG	Nup43
422	GTGGTCTGCAGGCTCCCGGA	Nup43
423	CAAAGAAGAAAGAAAGGCCG	Nxf1
424	GCAATGAATGATCCCCAGGA	Nxf1
425	AATCGTAGGTCTGGAAGAGG	Nxf1
426	GCAGGAAGAGAAACCAGACA	Nxpe3
427	AGAGTCTCTTCCGATCGGGA	Nxpe3
428	GCAGAACCAGGGCTCTCCGG	Nxpe3
429	AGAGCTGGATGACTACAGAG	Ocln
430	TCATCAGGTCTGTAAGGAGG	Ocln
431	GTACATAGATCCAGAAGCCT	Ocln
432	GCAGACACACAACAGGCATG	Ogn
433	TCAGAGGCACGAAGAGTAGC	Ogn
434	GCACAGATTCCAGGTCGTTA	Ogn
435	GGGTCGCTTGGAAGAAGCCA	Ogt
436	AAAGAGGGTACAGCATGCTA	Ogt
437	GGGGAACCTGCTCAAAGCCC	Ogt
438	GCGGCATCATATCTAAGCGC	Akap8l
439	GATGTTCTGGGAGAAGAGGG	Akap8l
440	ACTGCGGGCCACCATAAGCG	Akap8l
441	GCCGGGTTCAGGGCAGGCAG	Orai2
442	GAGGAAGCTCTACCTGAGCA	Orai2
443	TGAACCCGGCCACAAGGGCA	Orai2
444	TGGAAGTGTCTCCTACACAG	Oraov1
445	GAAGACCTGGACAGAATCAG	Oraov1
446	TCACAGATTGGATGCTACCG	Oraov1
447	CATGGGGAGGGATATCAGGA	Oraov1
448	GAGGAGGTGGCCATAGTCCG	Orc3
449	TAAGATAAGCACCACAGGAG	Orc3
450	AAAGAAGATATGGGATTCGG	Orc3
451	GACGACGCTCGCTGCCGGGT	Akirin1
452	CAGCGCAGGTTACCGGGAGT	Akirin1
453	AGGCTGAGTTTCTGAAGTAC	Akirin1
454	GTGACCCCGAACAAGAACAG	Osbpl11
455	GAGGATGCCTAAGAGCGAAG	Osbpl11
456	AACAGCGGCAACAGCAGCTG	Osbpl11
457	GAGATACTTCTGCGGCGAGG	Akirin2
458	GGGAAGAGACGTCGCCGAAG	Akirin2
459	GTGCGCGCCTTTGTCGGCGC	Akirin2
460	GCCGAAGCCGGCGCCGACAA	Akirin2
461	GTCTCTTCCCGGCTCACCAC	Akirin2
462	GGATTTGTCAAACAACACAG	Ostm1
463	AGCGCTGCGCACCATACAGG	Ostm1
464	GGAGACTTCCGCCACAGCGC	Ostm1
465	TAAGATGTCTGACACCGAGC	Otud6a
466	ACACCGAGCAGGAACTCCAA	Otud6a
467	GCACCAGGAGAGGATGCCTG	Otud6a
468	GTAGATCCCTCCGAATGGGA	Otud7a
469	GCAGAGAAGCGCCTGTCCCG	Otud7a
470	AGCGGGAAGCCCTGAAGCGG	Otud7a
471	TGGGAGGCACCTCCAAGGGC	Otud7a
472	AGAGGTAGCAGGAATAACAG	Oxa1l
473	GCTTGGTTCTTACACCCCGG	Oxa1l
474	GTTCTGGATGAGACCCACCG	Oxa1l
475	GGAGGGTGTGCGCCTTGATG	Akr1b3
476	TGAGGTGAGCAGCGAGGACA	Akr1b3
477	GGAGAAGCTCAAGGAGCAGG	Akr1b3
478	GCAGCAGCAGCTGCAGGACG	Pabpc1
479	GAGAGGCCATGGGGTAGCTG	Pabpc1
480	GCATCGCCTCGGTCACGTCG	Pabpc1
481	CGTGAACTTCCAGCAGCCGG	Pabpc1
482	TGGACGATTTAAATCTCGGA	Pabpc1
483	TATAGGTAATGATGGAGGGT	Pabpc1
484	GCAAGCCAGTACGCATCATG	Pabpc1
485	GTGTACAAATCCATAGCCCT	Pabpc1
486	GTTGGAAAACCACGAACCAG	Paf1
487	TGTGAAACAGCAGTTCACAG	Paf1
488	GAAACGAAAGCGGGACCAAG	Paf1
489	AGGGCTGGCCAAGTCCATCG	Akr1c18
490	GGAGGCCAGCACCGACAGGG	Pak1ip1
491	GCATCTGGGATGTGAAGAGA	Pak1ip1
492	GAGCCAACTTGCCAGACGGG	Pak1ip1
493	GAATGAAGAAGAGATAGGCC	Akr1c18
494	GAGATGGATGTGGATAGAAG	Pak3
495	AAGTAAACGAAGCACTATGG	Pak3
496	CGACAACATTCTCCTCGGGA	Pak3
497	GAAGTGTAAGGATGCAGGGC	Akr1c18
498	GCTCCACTTTAAAACTACGG	Pan2
499	AAGGCGACTGGAGAAGCCGC	Pan2
500	GAAGTGCCCCAGGCTTATCG	Pan2
501	GTACTGCCGCTACTACGCCA	Pan3
502	CAAGACGTGCTTCTACGGCG	Pan3
503	GCCAAGCCATACACAGGCCA	Pan3
504	GAAGAGGTGATACAGCACAG	Paqr4
505	TTATTGAACTGCAGGTGCGG	Paqr4
506	CTAGCCCAGTCCAGGAGACG	Paqr4
507	GCAGCCTTTCCACCCAACGC	Pax2
508	ATTGCTGCCCAGCTCAGGGT	Pax2
509	GAACCCGACTATGTTCGCCT	Pax2
510	GGGGTGTTACAGCTGAGCTG	Pax8
511	GGATCTTGCTTACACAGCCA	Pax8
512	GCACTGTTGAGTAAGGGCAG	Pax8
513	GAGGCCTCGCGAGAACAAAG	Paxbp1
514	GAAGGAGGAGGAGAAGCCCA	Paxbp1
515	GAATGATGCCAGCGACGATG	Paxbp1
516	TCAACTGTTTCCCTAAACAG	Paxbp1
517	GAAGCTTGGCTTTGGGACTG	Pbk
518	CCAGATGATGATGTTGATGA	Pbk
519	TGCCTTGCTATGGAGTATGG	Pbk
520	GGAGATCCGCGAGAGCACCG	Pcbp1
521	GAAGGCCTTAAAGATGGCAT	Pcbp1
522	GAGCGGGCTATCACTATCGC	Pcbp1
523	GCTACAGAGAAATTGTTCAG	Akt2
524	AGGAAACTCACTGTAAGGAA	Akt2
525	CATACTCCATCACAAAGCAT	Akt2
526	CAGGAGGGCCTGATCAGCAG	Pcdha1
527	CAGGAGGGCCTGATCAGCAG	Pcdha10
528	CAGGAGGGCCTGATCAGCAG	Pcdha11
529	CAGGAGGGCCTGATCAGCAG	Pcdha12
530	CAGGAGGGCCTGATCAGCAG	Pcdha2
531	CAGGAGGGCCTGATCAGCAG	Pcdha3
532	CAGGAGGGCCTGATCAGCAG	Pcdha4
533	GTTGTTGTGACCGCTCGCGA	Pcdha5
534	CTGGGGCCTCAGGGTAGCGG	Pcdha5
535	CAGGAGGGCCTGATCAGCAG	Pcdha5
536	TGTGCTTCTCGCAGCCTGGG	Pcdha5
537	AGAGCGATGACAGTCGCCAA	Pcdha5
538	CAGGAGGGCCTGATCAGCAG	Pcdha6
539	CAGGAGGGCCTGATCAGCAG	Pcdha7
540	CAGGAGGGCCTGATCAGCAG	Pcdha8
541	CAGGAGGGCCTGATCAGCAG	Pcdha9
542	CAGGAGGGCCTGATCAGCAG	Pcdhac2
543	GAAAGAACTGGATCGAGAGG	Pcdhb17
544	GAGAGGAGGAACCTGAGCTG	Pcdhb17
545	TGTGAGTACCAGAGAACCGG	Pcdhb17
546	GATTCGGCTACGAAAAGAGG	Pcdhb17
547	GTGGATATCAAGGCCACGGA	Pcdhb17
548	GTGGAAATCGCAGCCACGGA	Pcdhb4
549	GTGACACTGGCAGAGCGCAG	Pcdhb4
550	TGAACAGCAGCACAGACAAG	Pcdhb4
551	TAGATGAAATGAAACGGCGA	Pcgf2
552	CGAGGTCCTGGAACAGGAGA	Pcgf2
553	CGTACATCTACCCCTGGCGA	Pcgf2
554	CAGCGGTTGAAAGATTCCCG	Pcif1
555	ATCCCGAATCAAGTTCCGGG	Pcif1
556	TGAGCTCCTCGCAGAACGGA	Pcif1
557	GAGAACTGGAGCAGCAGCAG	Pclo
558	GAAGTTGCTGGAGGCAACGG	Pclo
559	GGAATACTGAAAAGGAGCCC	Pclo
560	GGACTGGAGGATCAACGGCG	Pcsk4
561	ACCACTGCTTGGAAAACCAG	Pcsk4
562	CGAGCGAGCGGATGAGGCGG	Pcsk4
563	CCAGAGAGGGTACACAGCCA	Pcyt1b
564	AAGTCATCAGAGACGCGCCA	Pcyt1b
565	GATTCATCAGCAAATGGGGC	Pcyt1b
566	GGACAAGCTGCAGGTGAAGG	Pdcd1
567	GCAGCTGTATGATCTGGAAG	Pdcd1
568	GACACACGGCGCAATGACAG	Pdcd1
569	GCAGGGAGATGGCCCCACAG	Pdcd1
570	AGCGGGCATCCTGGACGGGT	Pdcd1
571	CACGATGGATTCCTTCAAGG	Pdlim7
572	GCTCACCCGAGAGATAGAGA	Pdlim7
573	TGAGGCGCTCCCCACAGGCG	Pdlim7
574	GAAAAGCCAGCACCTAACGA	Pelp1
575	GAGAGGCCCGCACATAAGGA	Pelp1
576	GAGATGTCCCGAAACAGGGT	Pelp1
577	CAGTACCGTAATGCTAACGA	Pfn1
578	CTTCGTACCAAGAGCACCGG	Pfn1
579	CCAGCAGCAGCGCCATGGCC	Pfn1
580	ACCGCTCCGGCAAGACCTGG	Pggt1b
581	AACTGAACAGGATAAAGAGG	Pggt1b
582	TATGCTGGACTCCTTGGATG	Pggt1b
583	GAAGAGAGATTCGCTGGCTG	Aldoart1
584	CAGGCGGGTCATGTTGAAGA	Aldoart1
585	GGTGACCCATGGCAACGCAC	Aldoart1
586	CAGAAAACGGCTCTCAACGG	Phax
587	GGAATCTCAAGAGTACACAA	Phax
588	AAGAAGGTGAACAACATCTG	Phax
589	CCAGCTCGTCCACCTCGCGA	Phc2
590	GCAGCCCCGGCATGACCTCA	Phc2
591	GTGGTGGTGTGGTCCTGCTG	Phc2
592	GCAATAGCAGGCAGACCTGG	Alg1
593	TGGCCAGCAGCACAATGGGG	Alg1
594	GGAGAGAGACATACCAGCTC	Alg1
595	GAGCAGGCAGGACACCAGGA	Alg10b
596	CAGGCGCAGCGGTACTGCGA	Alg10b
597	GAAGGCGGAGAAGAGCAGGC	Alg10b
598	ATAGCCCTCCAGCTGCGCCA	Alg10b
599	GGTGCGTGTACGCCGTGCTG	Alg11
600	AATGTCTGCACATCACAAGG	Alg11
601	GGAGCCAGAATAGTCCCCGT	Phldb2
602	CAAGAGAGGCTGCAGAACTG	Phldb2
603	AAAGTCATCAGAGGAGGTGG	Phldb2
604	GCGGAGGAGAGAGAGTTCTG	Alg11
605	GCAGAACATGACAGCCACCG	Alg12
606	AAGCGAGAGCACATAAACCA	Alg12
607	TCACAGCCTGGCTGCAGCGG	Alg12
608	GTACCAAAGAAGACTGACGG	Alg12
609	GTGACCAGCAGCCCCAGAAG	Alg12
610	GTGAATGACTCAGTACGGAA	Alg13
611	GGTTGTAACCCAGACTCTCG	Alg13
612	AAGAGAGCGTTTGTGACTGT	Alg13
613	GCAGTGCCGCTCAGACGCAG	Pi4ka
614	GCAATGCTCATTAGCAGCAA	Pi4ka
615	AGTCAGGGACACCAATGCAG	Pi4ka
616	GTGGATGGAGAAAGAGTCGG	Pias1
617	GACACAGCAGCGAAACCCGT	Pias1
618	GTATCTACAGCAGGAAGGCT	Pias1
619	TATTCGGAGAACCAGTGGGA	Alg14
620	GACACACCACTGAGATCTTG	Alg14
621	GGCTTCTCGGAATTCGGTGA	Alg14
622	TAGCAAGATCACTAGCCCTG	Alg14
623	GCGCACGTAGGAGCAGATGG	Alg2
624	GGTCCTAACAAACAGAGACA	Pigf
625	AAGTTGTCCACGAAGAAGGA	Pigf
626	TAGGACCAAACCTCAAAGCA	Pigf
627	GTGGTTCGGGTCGTAGTGCG	Alg2
628	GACTGGCTGCCTCGCAGCCT	Alg2
629	GTGAGGAGCCAGCTCAGGAG	Pigm
630	GAGAACCAGGGAGGCGACGA	Pigm
631	GAAGAGCCGCAGTACAAAGA	Alg3
632	GTACAGGGTCGAGAGAACCA	Pigm
633	GGTCAATCAGCTCCTCACAG	Pign
634	GCAGTACACATAGTAAGTCC	Pign
635	GAGTGGTGCCACCAGAGAAG	Pign
636	TGTGGGCCATGCCTGCACGC	Alg3
637	GACGACCAAGGTCAAAGGAG	Alg3
638	AGAGGAACCACACCAGGAAA	Alg5
639	GAATCAGGGACACACAGTGC	Alg5
640	TAACAGCACCACCTTTCCCA	Alg5
641	GTAACAGTACAAAAGCACCG	Alg6
642	GAGTCTTCTAACAACCTGCA	Alg6
643	GAAAGAAGCCAGGACAGTAC	Alg6
644	GAGCCAAAGCAGAGAACCAA	Alg8
645	GTTGCCAAAGGGGAAACTGA	Alg8
646	GCGTCCGGGTCTGCAACCGC	Alg8
647	GAGCAGACACTTGAAAGCAG	Alg9
648	GTAGCTGTCAATGACCACCA	Alg9
649	TGTACATGCAGAAGCTGCTG	Alg9
650	GAGTTGGTAATACTCTCCGC	Pja2
651	GGCATGAAAGAAGCTTGGGT	Pja2
652	AGTGATAGAGCCAACCACCA	Pja2
653	GGACTCACAAACAAGAGCAG	Pkd1l3
654	GCAGTACTTACAAGCTCAGG	Pkd1l3
655	GGATCGAGAAGATATGCAGA	Pkd1l3
656	CCTGTCTGAAGAGACTGCAG	Plekhb2
657	TCAGACTCGGCAGAGCATAG	Plekhb2
658	CTAGACATCCAGCCTCCAGA	Plekhb2
659	GCACTCACCCTTCCCAGCAG	Alox12e
660	GCAGAGGGCCCAGACAGTGG	Plekhg2
661	GGAGATTGTGGAGACAGAGC	Plekhg2
662	TCAGCGTAAGCGAGACTCCG	Plekhg2
663	CAGGTGGGGCTCCTGGAAGG	Alox12e
664	GCGGTAGGTCAAACACGACG	Alox12e
665	GATGTTATCAAGGACCACGC	Plet1
666	CCAGGTGTGGAAGCAAGGAG	Plet1
667	CAAGGAGCGGAGCGACAGCA	Plet1
668	TTTGAGGAATTCCCGAGACC	Plgrkt
669	TGAGATGAGAGAAAGGCAAA	Plgrkt
670	TAGGTGAAGATGAAGCTTAG	Plgrkt
671	GGTACGGCCGCTGAGAGGGT	Plk3
672	GGCCAGAAAGGATCTGGCGC	Plk3
673	TCGGTGATGAGGCGACCAGG	Plk3
674	GGATGATACCAAAGGACAGA	Alpi
675	AAGCTGGCTGGCCTTTTCGA	Alpi
676	CAAATGCGAAGACATGGGAG	Alpi
677	AGAGTCTCTGGTTCAAGGCG	Pms1
678	GAAGACTCTGTAGTGGGTAG	Pms1
679	ACTGAACCCATACAGAGTGG	Pms1
680	GAAGCTTTTCCGTGAGGAGG	Pnma3
681	TAGGAGGGAGGAAAATGCCC	Pnma3
682	GGAACACCATATCAATCCCA	Pnma3
683	TTGGGGAGAACACTTGGTGA	Pnrc2
684	ATGGCAGGCCATGCAAAATG	Pnrc2
685	GCATTTCTAGATTGAGGGTC	Pnrc2
686	GGAGAGCTGCTTACATCAGG	Poc1b
687	GCTAGAGCTTACAGATACGT	Poc1b
688	CAAGGCTGTTACCCAAAGGA	Poc1b
689	GCTGTCACCCAAGTGTGGGA	Podnl1
690	CTGTCCCCGAGATGACACGG	Podnl1
691	TGTAAGGCTGCACAAAGCAA	Podnl1
692	GTGATGCTTTCAGCGAGTGG	Pole2
693	CCACAGTGGCTTATACACCG	Pole2
694	AGGTGTGAGCCTATCACCGG	Pole2
695	GGGCAACACTTACATCAAAG	Polr1a
696	CCTGGGTGAAGGAAAAGCCA	Polr1a
697	GGGCGCCACACAGAAAGGCT	Polr1a
698	GCACCGACTTAGTAAACCCC	Polr1e
699	GAAGTCTCTGCCCATAGATG	Polr1e
700	CGGAACCTACCAGCAAACAG	Polr1e
701	GAGTGTCCTTTGGATCCCGG	Polr2b
702	AAATCACTGACACCAACGTG	Polr2b
703	GAAGTTTATTGATCGCGGGA	Polr2b
704	GAGTAGATGCAAACGTCAGG	Polr2b
705	CCAGCGTTTGAAGCATATGG	Polr2b
706	GCCGAAGCTCAGCACGCCAG	Polr2b
707	CGACAGCATGGACGACGAGG	Polr2e
708	CACCAGGGACTGCTTGGCGG	Polr2e
709	GGTACTTTGGGATCAAGCGA	Polr2e
710	AGGGATGCCCTGGACGCTCT	Polr2l
711	GCTGCAGGCCGAGTACACGG	Polr2l
712	AACAAATGGGAAGCCTACCT	Polr2l
713	GCTCCAGCGGTCACTTCTCT	Polr2l
714	AGACGCCGCCATGATCATCC	Polr2l
715	CAAGACCATGGACTACGCTG	Polr3c
716	CCGACTCACAGAGACCATGG	Polr3c
717	GAAACACCTTGAGCAGAAGC	Polr3c
718	GGAGCGCGGGGTAGACGTGG	Pom121
719	GGAGAAGAAGAAAAGAACAG	Pom121
720	GGCCTGAGCCGAGAACCCCG	Pom121
721	AGGAGACACCACATCACTGG	Pop1
722	GCATAGCTGAAAACCAACCC	Pop1
723	GGCTTTATGGCTGAGAGAGA	Pop1
724	GAAGTGGGGTTACTGCCTTG	Pop1
725	CCGGGCAAATAAGTATCCCA	Pop1
726	CCGGGTGAATACCCTCCCGG	Popdc2
727	GGAGATTGAATTCCTCCGGG	Popdc2
728	GAACGTGGTAGAGGCTGGGA	Popdc2
729	GGATTCGCTAAGACCCACAG	Popdc3
730	GGCGGCATGACAAGAAACCG	Alyref
731	AGAGCGAGCTGTACAACACA	Popdc3
732	CACATGGAAATCTCGGGCGA	Popdc3
733	AAGCTGAACCGGAGCCAGCG	Alyref
734	CACAGCGAAGACCTGCACAG	Alyref
735	GCAGGAGCAGAGCAAAGAGG	Pparg
736	AATGCTGGAGAAATCAACTG	Pparg
737	GCTGTGGGGATGTCTCACAA	Pparg
738	GCGGATGCCACAGGCCGAGA	Pparg
739	GCATCGTGTAGATGATCTCA	Pparg
740	AGTGGTCTTCCATCACGGAG	Pparg
741	GAAGTTGTCCAGAAAGCGCA	Ppcs
742	CGCACGGCTCGCGCTTCCAG	Ppcs
743	AGCATTGCAGAGCTACCAAG	Ppcs
744	ACAGCAAGGAGCTATCCCGG	Ppef2
745	AGAGAGATTCGCCCAGGACG	Ppef2
746	AAAGATAACCAGACAAGCTC	Ppef2
747	GACGAATCCCAGCACTGGAG	Ppil2
748	GAGGCCACCTGAGAAGAAGA	Ppil2
749	GGCCCACTACTCCACAGGGA	Ppil2
750	GGTCTCCAAGAGAACCGCCA	Ppil4
751	GAATCCAGTGACCACAGATG	Ppil4
752	GTCACTGCCGTTGTTCACCA	Ppil4
753	GCCGCCCCTGAAGCTGAAGG	Ppil6
754	GAAGTGGGCCCAGAAGGTGT	Ppil6
755	CAACCGCACGTGACATGCTG	Ppil6
756	GCATCACGTGGACTAAGTCA	Ppm1a
757	CCATAAACCAAGTAACCCGC	Ppm1a
758	ATTAACTGTGGAGACTCGAG	Ppm1a
759	GGAAGACGAGGATGACACGG	Ppm1g
760	GCGGAGAAGCCGTAGGGCAG	Ppm1g
761	GCCCCAGGGCCTCAATGGGG	Ppm1g
762	GCACCTTGTGCACGAAGCGG	Ppp1r13l
763	CTGCAGAGCCCAAAGAGCGG	Ppp1r13l
764	GGTACAGTCTGTGCTTCCGG	Ppp1r13l
765	GGAGCCTCACCTGGACCCGG	Ppp1r1a
766	GAGGGAGCCACTGAGAGCAC	Ppp1r1a
767	TGGTGTGGAGCCCAGAACAG	Ppp1r1a
768	GGCACGTGGAAGCGGAGCTG	Ppp1r21
769	GACTCTAGAAAAGGAGGCCA	Ppp1r21
770	GGTGACGTTAACAAACGGAG	Ppp1r21
771	AAGGGGACTAATGAATCCGC	Ppp1r21
772	GAGTACCTGAAGGCAAGGGG	Ppp1r26
773	AATGCCCAAGAAAATAAGGG	Ppp1r26
774	GGGGACAATAAAGATGGCCC	Ppp1r26
775	GGACTCGAGAGCATGACTGG	Ppp1r8
776	GAACAGCGGGAGGCTGGAGC	Ppp1r8
777	CAAGTCGGGCAGTCGAACAG	Ppp1r8
778	TGGATGGAGACAGGCCACCG	Ppp2cb
779	CAAGGAGCTGGACCAGTGGG	Ppp2cb
780	GAGCGCATCACAATATTGCG	Ppp2cb
781	GAAGCTGCACATAGACAACG	Amer3
782	GGAGAGCAGCAGCGAGCCTA	Amer3
783	GGTGGTTCCACAGAGGGGCA	Amer3
784	GCTTTGTTCCCAAACCGGGA	Ppp2r4
785	CAATCTTGCAGAGACAACAG	Ppp2r4
786	GTTGCAGAAGACATACAGGA	Ppp2r4
787	GGTCTGACACGAAGTCAAAG	Ppp2r5d
788	GCGGGCAGGACTCAATGAGA	Ppp2r5d
789	GGTGGAGACAGAGGCCGTGC	Ppp2r5d
790	GCGATAAGGAACAGAAGTTG	Ppp3r1
791	CAGGTGTTGAAGATGATGGT	Ppp3r1
792	AGCAGAACCCTTTAGTACAG	Ppp3r1
793	TGTCTGTTGCAGGTCGTAGG	Ppp3r1
794	AATGCAGATAAGGATGGAGA	Ppp3r1
795	GTACTGGATTCAGATGGCAA	Pram1
796	GAGGTTGTTGAGCTTGGAAG	Pram1
797	TGGGGTGTCTCAAGCTGTGG	Pram1
798	GCAGTGGGCAAAGGACAGAG	Pramef17
799	GGAGTTGGAACTGAATACAG	Pramef17
800	TCAGCCTCCTTGAATAGTGG	Pramef17
801	GGGCTGCTCATCGCTGCGGG	Preb
802	GGAGCACAAGTTCACCCCGA	Preb
803	GAAGCGCGTACAACGGGAAC	Preb
804	TCAGGTTCTGAATCTCCCGG	Prkaa1
805	ATGGTCATCATCAAAAGGGA	Prkaa1
806	GACAATAATCCACACCGGAA	Prkaa1
807	GAGGAAGAAAACCCTCGGGA	Prkacb
808	CCAGGGTTACAATAAGGCGG	Prkacb
809	GGGCGTGCTGATCTATGAGA	Prkacb
810	GAGCCACATCCAGATCCCCG	Prkar2a
811	CGACCTCGTCGACTTCGCGG	Prkar2a
812	AAGAGGAGGATAACGATCCA	Prkar2a
813	GGTGATGCAGATCATCGTGA	Prkcq
814	GTGGCTCGAAAGGGAGGCCA	Prkcq
815	TGACAAGCACAGCGCAGTAG	Prkcq
816	TGAGGAGTGGAAGACAGCCC	Prkcsh
817	AAGACCAGGTAGAAACACTG	Prkcsh
818	GAGCTGGACACAGATGGAGA	Prkcsh
819	GTCCTCCAAACCAACTGCCA	Prl3d1
820	TCTTCGAGTCCAGTCCAAGC	Prl3d2
821	GTCCTCTAAACCAACTGCCA	Prl3d2
822	AAATTCCCTGTACACATCTG	Prl3d2
823	GAGCAGTCAGTGCAGACACC	Prl3d2
824	GAAGTCCCTCCAGAATTATA	Prl3d2
825	CCATACTCCAGAGAATCGAG	Prl3d2
826	GCAGCGGCATAGGTTATAAA	Prl3d3
827	GTCCTCCAAACCAACTGCCA	Prl3d3
828	GAGCAGTCAGTGCAGACACC	Prl3d3
829	GAAGTCCCTCCAGAATTATA	Prl3d3
830	CCATACTCCAGAGAATCGAG	Prl3d3
831	GGACCTGGAACTTGGAGGAG	Ampd1
832	CCATATTGACGCCGACAGGG	Ampd1
833	AGGGGCACTTCTGCTGGTGG	Prl7a2
834	GAATCTGTTGAGCTTCGTCC	Prl7a2
835	AGAAGTTACTCACAGGGGCA	Prl7a2
836	GCAGTTATAAAAGTCCCGGT	Ampd1
837	GAGTCTAGCCCAGAAAGCCC	Proca1
838	GCCTCAGCTGAGATTGGGGT	Proca1
839	GTCATATACATATGGTGGGT	Proca1
840	AGTGGAGACGTAGAGGGAGA	Prokr1
841	GAAGTCTGAAATGGCCAGGT	Prokr1
842	GACTTCTTTTCTGCACTCGA	Prokr1
843	GAGCATGGGACAGCTCCTGG	Prpf19
844	GAGGTCACTGCTGCTCGAGA	Prpf19
845	GAGAGGAAAGACTGTCCCCG	Prpf19
846	AGAGCTCAGCAAGTACCGGC	Prpf19
847	TAATGGGGCCAGAATGGCCA	Prpf19
848	AGAAGGATGAAACACCACAC	Prpf19
849	CGAGCTCAAGACCTACCACG	Prpf38b
850	AAGGGGAGTAGGAAAACTGC	Prpf38b
851	GTTAACTCGAAAGCAAGTGA	Prpf38b
852	CAAACGGAAAGAAGTTATCG	Prpf4b
853	TCAGCTTGCTCCCGCAGGGA	Prpf4b
854	GAGTCTGGCTCCGAAGAAGA	Prpf4b
855	AGGCCAGAGCACAAAAGCCA	Prrc2c
856	TGGGCCAGTAACAAGCAAGG	Prrc2c
857	TCAGAAGCCCAAGAAGGAGG	Prrc2c
858	GCCGTGAGGAGGAAGAGCGA	Prrc2c
859	TAACCATGCTCAGAATGCAG	Prrc2c
860	AGAAACTGTAGAAAAGCCAG	Prrc2c
861	GGAGGCAGGGAGGAAGCCCA	Prrt4
862	GCTTGGTGGGCCCTGAGAGG	Prrt4
863	AAGAGGGGCACCTGGTACAG	Prrt4
864	ATAGAGGCCTCACTCTGAGG	Prrt4
865	AGGCGGGATGTGGATTCGGG	Prrt4
866	CCTAGGTTGAGAGTGAGCAG	Prrt4
867	GGGTCTTCCTATTGAAGTTG	Prss1
868	CTTTCCCAGGGTGACTCTGG	Prss1
869	ACTGGTAACATGGTCTGTGC	Prss1
870	TGGCCGCAGGAGCATCCCCG	Prss50
871	CAGAAGCCATGACTCGGCGG	Prss50
872	TGCCTCGGACAACAACAGGG	Prss50
873	GGGTTGTCTGAACGGTGGGG	Prss53
874	CAGGGTGTACACATCTGCAG	Prss53
875	AAGCAGGAGGGGCAGAGCCC	Prss53
876	GAGACTCACCCCAGTGCCGA	Psma3
877	CCAGCATCTTGCAGACAGAG	Psma3
878	TCCATCAGGAGAGAACGTAG	Psma3
879	GACAGAGATAGAAAAGCTTC	Psma3
880	TGTTCCCAAAGACATAAGAG	Psma3
881	TAGGGACATGGCTTGCAGCG	Psma4
882	GTGACCCAAGTGGAAACTAT	Psma4
883	GCCACACTAACAAGAGAGAG	Psma4
884	TTTAAGGCTATTAACCAGGG	Psma6
885	TTGGACATTTGAACAGACAG	Psma6
886	GGCGCTGGAACCCCGGGACA	Psma6
887	AGTAATAGACAACACAGCGG	Psmd1
888	AAAGGAGGACAACCTGCTGA	Psmd1
889	GCAGCTCCATAGCGCACGTG	Psmd1
890	GGAGAGGCTGCTCCAAGCTG	Psmd5
891	CGAGCTTCGCGAGCAGGCGG	Psmd5
892	GGAGAAGGTGTTTGAAATGG	Psmd5
893	GAATGAAGAAGAGCTAGACA	Psme4
894	TTAAAGAGGCAGAAACGCCG	Psme4
895	GGCACTGTCCAACATGACAG	Psme4
896	CAGGGGTCATCAGGCAGAGG	Psors1c2
897	GGGTCCCAGAGGCAATGGTG	Psors1c2
898	AAAGGAGGCGCCCCAGGCCA	Psors1c2
899	ATGTGATGTCACCGAAGCAG	Ptbp3
900	AATGTCCTCTCCATATGCAG	Ptbp3
901	CGAAGATGGAGAACACGGGA	Ptbp3
902	GGAGAACTTCCAGAGTGACA	Ptbp3
903	GCTTACTGGAGTCAGAGCAG	Ptcd1
904	GCTGTGTATGTGGCATCCGA	Ptcd1
905	GGAACCTTCTCAGAAACTCG	Ptcd1
906	CCAGCACCGAGCTTATGCAC	Ptcd3
907	CAGGGATAAACATCCACCAG	Ptcd3
908	ACTCACAGACTCCAGAGCAG	Ptcd3
909	GCAGGACCTGAAAGAAAAGA	Ptms
910	GCGGAAGAGAACTGCTGAAG	Ptms
911	AGAAGGCCGGCCGGAAAGAA	Ptms
912	AATGCAAGCGCAACTAGCAC	Ptp4a2
913	GAAGTACGGAGTGACAACTT	Ptp4a2
914	ACTGGACACTCACTAGAACG	Ptp4a2
915	CCTTCAGCAAGAACACACAG	Ptplad2
916	AGTCGAATCAGCTTTTCCCA	Ptplad2
917	AGCGTAAAACGTGTCGGCCA	Ptplad2
918	GTGGAACTTACTGAAAGCAG	Ptpn12
919	GAGTACCTTCGAGTCCGCGG	Ptpn12
920	GAAGAGGGTTGGTAAAGCTG	Ptpn12
921	GAAGAGTCCGGATCACAATG	Ptpn12
922	GCACTCGGCAGTACAAACAA	Ptpn12
923	GACGACTCGGACTCAGACGG	Ptpn12
924	GCAGAAAGTCATCCACACGG	Ptpn5
925	GCTGCAGGGCTACAGTGGGG	Ptpn5
926	GAGAGGCAGCAAACAGGCAC	Ptpn5
927	GGGGATGACAAACATTATGG	Ptprd
928	GTGTGTTGCCACCAACAGCG	Ptprd
929	ACAGCCAATCACAGACGAAG	Ptprd
930	CCTGACGCCCGAGCAGCAGG	Puf60
931	GGCGTGGCAGGTGTTAGCAG	Puf60
932	GGGGTAGGGCCCCTAAGGGC	Puf60
933	GGTTGGTGTGAGGCCAGCGC	Pus1
934	CAACCGGACAGGAAGGGCCG	Pus1
935	CTTGTGAGCAAAGGCAAAGG	Pus1
936	GGAGACAGATAAAACCACGC	Pus10
937	AAGGAAAATGGAATCTTCGG	Pus10
938	GACTGAGGAGAACAAGCACG	Pus10
939	GGATGGGTGTTTGTAAGGTG	Pus10
940	GCTGGTGAATTCAAACCCAG	Pus10
941	GAATAGAGCTATCCAGAAGA	Pus10
942	ACAGGTCGTCAACGGCGCGC	Pwwp2b
943	GCAGAGGAGTTGTCAGCCAG	Pwwp2b
944	GGGGCACCCTCAAAGTATGG	Pwwp2b
945	CAAGAGGGAGAAGCGGGAAG	Pwwp2b
946	AGGGATGTGGAGCCCAGGGG	Pwwp2b
947	TTAAAGATCTTCCTCGCCAG	1110001A16Rik
948	GGTGTTGTTACACTCAACAG	Rab3il1
949	GGCCTCCTCCCAGGAAGTGG	Rab3il1
950	GGGCTCCGAGTTCCTAAAGG	Rab3il1
951	GATCGACATGCTACAGGCAG	Rab3il1
952	GGAGAAGCGGAACAGGACAC	Rab8a
953	ACGTGGAGAAGATGATACTG	Rab8a
954	ATTAGGACCATAGAGCTCGA	Rab8a
955	GACGTCCGAAGAGCAGGCAG	Rabggta
956	GAGGGTGGCAAAATCAGGGT	Rabggta
957	GACTCAGCAGCCAGCAGCGG	Rabggta
958	GAGACAGCGCAGAGCAGCCA	Rabggta
959	AAGAGCAGCCAACTCCTCAG	Rabggta
960	GCAGTGGCTGATCAAAATCG	Rad21
961	TAACCGATGACATCTCGCTG	Rad21
962	CAAAGAGTTTGAGAATCCAG	Rad21
963	GGAGGGCTCCGGGACAGCAG	Rad23a
964	GGTGACACCGCAGGAGAAGG	Rad23a
965	GATGTTGAATGAGCCTCCCG	Rad23a
966	GGATTTGAACTGCATACACC	Rad54b
967	TCAAATCCTTGCCCCAGTGA	Rad54b
968	TGCAGCACCAAGTCAGGTGC	Rad54b
969	GCTGCAGACAAGTACCACCG	Rai1
970	GGAGTGGCAGTCCCTAGCAA	Rai1
971	GCGACCCACAGACCGTGCAG	Rai1
972	GAAAAGCAAAGCCAACACCG	Rapgef2
973	GGCACTATCAAGCGAAGGGG	Rapgef2
974	CGTGAGGGACTGCCTGGAGA	Rapgef2
975	AGTGCTAGCAGCTGAGCTTG	1110001A16Rik
976	GAAAAGCGAGAAACTGCGAG	Ankrd1
977	GATCGTGGAGAAGTTAATGG	Ankrd1
978	TCTCCGACAGTATAAACGGA	Ankrd1
979	CATGCCTCTAGCAAATGGAG	Ankrd10
980	CTTATACAACGAGTTCAGCG	Rasl10b
981	CATAGACCAGGATGTAGGCG	Rasl10b
982	AACAAACCGAAAGAGATGCC	Ankrd10
983	GTCAGCAGATCCTGGAGACG	Rasl10b
984	TACAGCCTGAGAAATGCCAG	Ankrd10
985	GGGGAGGAGAACGATGCCCA	Ankrd11
986	TCTCCCGAGCCCAGCAGCGG	Rassf3
987	CCCGAACGGGACTTGCCCGG	Rassf3
988	CTAGGATGTGGAGAAAGAGA	Rassf3
989	TAGGGGCTGGAGAGAAACTG	Ankrd11
990	GGACTCACTTTCTGACCCAG	Ankrd11
991	GGCCCAGCTTAACTGCCCAG	Rbbp4
992	GGACACTGGCAATCACCAGG	Rbbp4
993	GATACAGAACAAATCACCCA	Rbbp4
994	AGTTCCAAAAGAAGGAAAGG	Rbbp4
995	GCCGCCATGGCTGACAAGGA	Rbbp4
996	GCGGCGATCAGTACCACTTG	Rbbp7
997	CCTTATGCGATTCAAAGGTG	Rbbp7
998	CCTAAACAGACCAGAAGGAA	Rbbp7
999	TGTGTGAAACGAGCGCGGGG	Rbm15
1000	AGGGCGGCCAAGCATGCCAG	Rbm15
1001	CCGGAGGCCAGAGGACGCGA	Rbm15
1002	GCCATGGATGAGGATGGGGA	Rbm8a
1003	GATGGGGCAGCCAATCAGTG	Rbm8a
1004	TAGAAGAGGGGTCCCGAGCG	Rbm8a
1005	AGCGACAGCGACAACAGCGG	Ankrd17
1006	GTAGCCTCCAGCACAAGCAT	Ankrd17
1007	ATGACCTCCTGCACAAGCCA	Ankrd17
1008	CAAATGGGCAAGCCTTACGG	Rc3h1
1009	ACTGAGCAGGGTATACACGG	Rc3h1
1010	AAAGCTGGGGCACTTCCTCG	Rc3h1
1011	AAGCTCCATCAAGATCCCGG	Rcor1
1012	GCTATCGCCAAAGAGAAGCA	Rcor1
1013	GCCATGCTCGGAAACAGAAG	Rcor1
1014	GAAACAGAAGCGGGAGCGGG	Rcor1
1015	GAAAGAAACATGCCTTTCGG	Rcor1
1016	TCTTTCTCAAGAAGATGTGG	Rcor1
1017	GATACAGGCCTAGAAGGGCG	Reep6
1018	GCAGCTGGGATAACCCGGGA	Reep6
1019	CCAGAAAACGTTCGAAGCGC	Reep6
1020	GCACTCACGAAGCATATGCG	Reep6
1021	TTTTCTGGAACAGAAGAACG	Reep6
1022	CCTACAAACACCAGCTGCGG	Rem2
1023	GGATGACAGGTAGGTCATGG	Rem2
1024	GGGAGACCATGCTCACGAGA	Rem2
1025	GAGAATGTGGTCAAAGACAG	Ren1
1026	GAAGTTGATCATGCAAGCCC	Ren1
1027	GGTGCGTGTTGGGAGACTGA	Ren1
1028	GAGAATGTGGTCAAAGACAG	Ren2
1029	GAAGTTGATCATGCAAGCCC	Ren2
1030	GGTGCGTGTTGGGAGACTGA	Ren2
1031	GAAGAGGAACTGGAGAGCGG	Rgl1
1032	GCTGAGACCAAATACAGCCC	Rgl1
1033	AAAACCAGAAGCGGACCCAG	Rgl1
1034	TCAGTGATCTCATGAGCCAG	Rgmb
1035	AGTGATCCTTGAAAGTTCGA	Rgmb
1036	GTACACCAGGTTGCCTCGGC	Rgmb
1037	GAAGCACATAAGGATGACGT	Rhob
1038	CTATGTGGCGGACATCGAGG	Rhob
1039	GGCCATCCGCAAGAAGCTGG	Rhob
1040	GTGATTTCTTCTGCTCGGGG	Rhot1
1041	CAAGTGAAGGCTTGAGGTGG	Rhot1
1042	AAAGCACTTAAGTGACGGTG	Rhot1
1043	TGAGCTGAGTTTACCTTGGC	1110001A16Rik
1044	GGGCTGGAAGCTCTTTCTGG	Ribc2
1045	TAAACTTCCAAGAGAGGAGG	Ribc2
1046	AGGCCAACCTAGCCAAGAAG	Ribc2
1047	CGTGGGCCACGAGTTCGAGA	Rilpl1
1048	ACAGGAGCTGGAGCTGGTGG	Rilpl1
1049	GGAGGTGGTGGACAAGCAGA	Rilpl1
1050	CGAGCACAGCCAGAATGGGG	Rilpl1
1051	GGGGTCCTTGAGGTCCAGGG	Rilpl1
1052	AAGATGCCTCCTCAAAGGGG	Rnf10
1053	GCAGCTGATGAAGAGAGAGA	Rnf10
1054	GGGACCCAAAGCAGAATCAG	Rnf10
1055	AAGACCATTCTGGAGTGTCG	Rnf103
1056	TCAAGATTTGGAATACGGAC	Rnf103
1057	GTCGAGGGCTGGGCTACTCC	Rnf103
1058	AAGCCTGATCAACATCCGGA	Rnf157
1059	GGGGTTTCCCAGATGTGCTG	Rnf157
1060	AGACCGTGCACTACAAGCGA	Rnf157
1061	GAGGCTCTCCACCACAGCCT	Rnf181
1062	AGTTGGAATGGAAGAGATGA	Rnf181
1063	GGACTTTGAGGACCTGGGAT	Rnf181
1064	AGAACATGTGAGGGCAGAGG	Rnf185
1065	GCCAGAGCCAGAAAATAGAG	Rnf185
1066	CATATGCCTGGACACAGCCA	Rnf185
1067	CGCACGCCCGGCAGAAACGG	Rnf187
1068	GCGACAGAGCAGCTGCAGCG	Rnf187
1069	GCAAGAGGCTGAGAAGGATG	Rnf187
1070	ATACGGTCAGGAAGCACCTG	Rnf219
1071	AAGGGTTTTCAGGAGTGATC	Rnf219
1072	GGATCCTTTAGCGTTGATGC	Rnf219
1073	TCGTCCGGACAATGTAAAGT	1700030J22Rik
1074	GCTCAGGTTTCTGGAGACGG	Rpl10a
1075	CTTCACGTGGCCAACAGCGA	Rpl10a
1076	GAACGCACACCGAGAACTTG	Rpl10a
1077	GCGGCTGCCGAAGATGGCGG	Rpl13a
1078	GATCCCTCCACCCTATGACA	Rpl13a
1079	AGCGTACGACCACCACCTTC	Rpl13a
1080	ATACTCACGGGAGTTGGCAT	Rpl19
1081	GTGACCAGGCTGAGGCTCGC	Rpl19
1082	AAACACCCTGGCCCGACGGA	Rpl19
1083	TGAGCTGGCCAGCCACGTGA	1700030J22Rik
1084	TCACCTTGTAGAATTTCCTG	Rpl35
1085	AGACTAGAGCCATGCGCCGC	Rpl35
1086	CACTTTGGCGACCCGAAGCT	Rpl35
1087	CACACGCTGTGCCGCCGCTG	Rpl37
1088	AAGTCGACTTGTGGCAAGTG	Rpl37
1089	ACAGGCTAAACGCACCAAGA	Rpl37a
1090	GGCAAGTACGGGACCCGCTA	Rpl37a
1091	ACCACAGTGCCAGATGCCGA	Rpl37a
1092	CCAACCTCCAAGAGGGACCG	1700030J22Rik
1093	ATGATGCGCAAGGCTATCAG	Rplp0
1094	CATACAGGGTGTCCGCAACG	Rplp0
1095	GTCGCTCCGAGGGAAGGCCG	Rplp0
1096	CAAGAAAATACTAGACAGCG	Rplp2
1097	ATTGAGGATGTCATCGCTCA	Rplp2
1098	CTGGCCAGTGTGCCTGCTGG	Rplp2
1099	GAGGGCGGCCAGCAGGTAAG	Rplp2
1100	GCTGAATGGAAAGAACATTG	Rplp2
1101	GGACGATGATCGGCTCAACA	Rplp2
1102	GATGTCTTTGGCGCTAGGAG	Rplp2
1103	TGTAAGCCACAATCACCGGG	Rpn1
1104	GCAGTCTCGGCTGAAGACGG	Rpn1
1105	GTGTCCCAGGAACATCCAGG	Rpn1
1106	GGCGAGCGGTAAGGGCACCG	Rpn2
1107	GGTCAGCCTGCTGGGAGAGG	Rpn2
1108	GACCTACCCAGCCAAAGCCA	Rpn2
1109	GAACCCCGAGAACCAGGCGC	Rpp21
1110	TGGCGGGCCCAGTGAAGGAC	Rpp21
1111	GAGCGCGTCTCACCTGGTAC	Rpp21
1112	GCAGAATGGAACAGTACCGG	Rpp25l
1113	GCTGTGGCCCCAGACCCCGA	Rpp25l
1114	AAACCTGCTAGGGCTGGCGC	Rpp25l
1115	GTGGATGAGCCACAGGGAGA	Rprd1b
1116	TGGGTCCTGCGTGCTTGCGG	Rprd1b
1117	CAAGAACGAAGTGTGTACGG	Rprd1b
1118	TTTTCAGCAGATACAAGAGG	Rprd1b
1119	CCAGCTGGCTCGGATGCTGG	Rprd1b
1120	CCAGTCGGTGACCAACACCA	Rprd2
1121	GACTCAGAACCAGTTGGGGA	Rprd2
1122	GAGAGGTGGAGCTGCCGTCG	Rprd2
1123	TCACCGTGGGGACGCTACGG	Rps13
1124	GTTGACGTCTGACGACGTGA	Rps13
1125	AGAGAGCAGAATTCACCGAT	Rps13
1126	AGACCCAGCCATTTCAGCAG	Rps19
1127	GCACGGCACCTGTACCTCCG	Rps19
1128	GTACCTCCGAGGTGGTGCTG	Rps19
1129	AAGTCACCTCAATGAAGTTC	Rps23
1130	GGGTGCAGCTCATTAAGAAC	Rps23
1131	ACTGTTTGTCATGCCACTTC	Rps23
1132	GCGGATCAGACCGTGGCGGT	Rps29
1133	CGTGGCGGTTGGAGCAGACG	Rps29
1134	CGGCAGTACGCGAAGGACAT	Rps29
1135	AAGTACCTGCCCCACAGTGC	Rps5
1136	AGACTCAACACGCATTGGGC	Rps5
1137	GCATACCGTCCGGCACTGTG	Rps5
1138	GAACAGGTTCAAGTTAGAGT	Rps6ka6
1139	GTTACGGACTTGATGAAAGG	Rps6ka6
1140	GTCCCAGGGATCCTCCACAG	Rps6ka6
1141	ACTAACCACTGAGATACTCG	Rps6kb1
1142	GGCCCATGAGGCGACGACGG	Rps6kb1
1143	AGGCTCTGAGGATGAGCTGG	Rps6kb1
1144	GTCCCCGCTCACCTTGGCTG	Rps7
1145	TCCCAGGAAATCGAAGTTGG	Rps7
1146	ATAAGCAGAAGCGCCCCAGA	Rps7
1147	GGATGACGACGAGGAAGATG	Anp32a
1148	CCAGCTAGTGGAAGATGAAG	Anp32a
1149	CGATGTTGAGGGCTACGTGG	Anp32a
1150	GCCGCTTACCAAACTCCCGC	Rsg1
1151	ATAGTACACCATGAGACCAC	Rsg1
1152	ACAATCACCGAACCGTGCAT	Rsg1
1153	GGCGTGCATCAGAGCCCCGG	Rtdr1
1154	GGCCCGGCAGCCATAAGCAA	Rtdr1
1155	GTTGTCAGACACGGATGAGG	Rtdr1
1156	GGTGAAGGCCAATGCCGCCG	Rtdr1
1157	GACAAGGCAGAAAGCCCTAG	Rtdr1
1158	CCACCTGCCTACGTAATGGG	Rtdr1
1159	GGGAGCAATCGTTTACACCG	Antxrl
1160	GGAGCTGGTGGTGATGAAGG	Antxrl
1161	AAGTGCCGAACAAGGCATGG	Antxrl
1162	GAGGCTCCCACCTTTAAAAG	Antxrl
1163	GGACCAAAGATAAAACACAC	Antxrl
1164	CTATGTTCTTAAGCACGAGA	Antxrl
1165	GAAGGAGTCAAAGATGCTGT	Runx3
1166	GGTTGGTGTATAGTTGGGGA	Runx3
1167	GCGAGGGCAGCACGGAGCAG	Runx3
1168	GGCAAGATGGGCGAGAACAG	Runx3
1169	GGACCAGCTCGGCCACACCC	Ruvbl1
1170	ATAGGGCTCAAGACTGCTAA	Ruvbl1
1171	AAGCACTCCAGGGACCAGCT	Ruvbl1
1172	TCCGGACACCAATGGAACGG	Ruvbl2
1173	AGGGCAGCTGACCTGAGAAG	Ruvbl2
1174	GGTGGCTGAGTGGAGAGAGG	Ruvbl2
1175	CACGATGACAGATTACGGCG	Rwdd1
1176	CACCATTACTGTGACATCGG	Rwdd1
1177	GGAAGCAGAAGAAGCAGAGA	Rwdd1
1178	CAGGGGCCCATCCCAAGCAG	S100pbp
1179	GGAGATCTGAGAGAACACAG	S100pbp
1180	GGACCAGCAGCTGAAACCCC	S100pbp
1181	CAGGGCATCTAGCTCTCCCA	S100pbp
1182	GTTTGAAGGAGAAGAAAGCA	S100pbp
1183	GCAGGAAGAAGTAGCCACGC	S1pr3
1184	GGTGACCAAGAAGAGGATGG	S1pr3
1185	GCGCGCATACAAGATGACGA	S1pr3
1186	AAGCGGAACCTGGATACGGG	Safb2
1187	AAGGGAGCTGGCAGATGCGC	Safb2
1188	GCAGATGCGCCGGGTGGAGG	Safb2
1189	AGAGCACCTTCTGAACACCA	Samd11
1190	GAGATCGGCCTTGGACCTGG	Samd11
1191	AAGTAGCAACTGCAACACTG	Samd11
1192	GGGGAGCAGGCGCAATGGGA	Sap130
1193	GTAGCATGGGATGAATGGGA	Sap130
1194	GAATGGGTTGCTAATAGGGT	Sap130
1195	TGAAGGCGAAAAGGGAGCCG	Sars
1196	AATATGCACTGCGTACCTTG	Sars
1197	GGACGAGTGGCTGCGGCCAG	Sars
1198	GGAAGGCTTGGGAGCACAGG	Satb1
1199	GCATCTGTCACATACGACAG	Satb1
1200	GCCGTGAGAGAGCTGCGCAG	Satb1
1201	ATCGGTGTTGACACAAGCCC	Satb1
1202	AGATGCCCCTGATGCCACGG	Satb1
1203	ATGCTCACCACAGCAACACG	Sbno2
1204	GCAGGAGCTGAGCAGGGACA	Sbno2
1205	GGAGTTATCCGTATTAGTGA	Sbno2
1206	AAGCTCTCCAATCACCAGGA	Scgb2b3
1207	CAGGACTGCTATGAAGAGGC	Scgb2b3
1208	TGAGCACTGTCTCTGGGAAA	Scgb2b3
1209	GATGGGAACCAGGCAGGCAG	Aox3
1210	GAAAGGATTGCCAAAGGCCA	Aox3
1211	GCCAATCACAAGTGGAGCGC	Aox3
1212	GATGACATGTTGATAACTGG	Aox3
1213	ACACCGAATCAATATTGCGA	Scml2
1214	AGAACTTTGAAAGATTGCCG	Scml2
1215	GTTGGGACGTGTGAACAAGG	Scml2
1216	AGACTCGACCTCGGACACGG	Aox3
1217	AGTTTGAGCCCCTCTAGAGG	Scml2
1218	GCAAATCCCAGACCTCGGGG	Scn5a
1219	GCACCGGGTGGAAGGGGCTG	Scn5a
1220	GAAGAAGCTAGCCGATGTGA	Scn5a
1221	GGTCTTCAATGAGAACGAGA	Scnn1g
1222	GAACGAGAAGGGAAAGGCCA	Scnn1g
1223	TCATGAGTCGAAGAAACTGG	Scnn1g
1224	GCGGACAGCAGTGTGACCAG	Ap1b1
1225	ACGGAGGAGGCAGCTAAGGG	Ap1b1
1226	GGAGATGCTGTCCAAGGACC	Ap1b1
1227	GTATGCTACAGAAGTAGACG	Ap1b1
1228	TGGCCGCTGTGCCATCAAGG	Ap1b1
1229	CAGGTGAGAAATGTAGCTGG	Scx
1230	TACAGGTAGCGACCCGGCGG	Scx
1231	CTGTCGGAGGATGAGGACCG	Scx
1232	GTGGAAGCTGAAGACAAGGA	Ap1m1
1233	CGATATATCACACAGAACGG	Ap1m1
1234	CATCTGCAGGAACTACCGTG	Ap1m1
1235	GTACTTTAAGGAGTTGGAGG	Ap1m1
1236	GGCATGCCTGAGTTACGCCT	Ap1m1
1237	GCGGCGGATGAACAAGAGGC	Sec11a
1238	GTTGAAGATCCTATACGCGT	Sec11a
1239	AATAATGCTGTTGATGACCG	Sec11a
1240	GACGTGGTAGGAAGAGCTCG	Sec11c
1241	CGTGGGGAGATGCGTCCCCA	Sec11c
1242	CAGCGAGAGTCCCATCGTGG	Sec11c
1243	GGATATTGCCATACATGGGG	Sec13
1244	GCAGCTGGCAATGGTGCTGG	Sec13
1245	GAAAGTCATCATCTGGAAGG	Sec13
1246	GAAGAAGGGGTAGATGCAGG	Sec16a
1247	GATGCACTGGAAGCCTGTGG	Sec16a
1248	GAAGAGCCACAACCTGCAGA	Sec16a
1249	CCAGACGGGACTGCCTGAGG	Sec16a
1250	GCTACTGTGGGCCTCACCAG	Sec16a
1251	GAGCTGCATGATAAGACCGG	Sec61a1
1252	GTGATTCTGGCCTCTAACAG	Sec61a1
1253	GACAACGGCAAAGACGAAGA	Sec61a1
1254	GATGACATGATCCCAAACAG	Sec61a2
1255	GAGGAGACAGATAGTAACAA	Sec61a2
1256	CCATTGTGTATGTCATGACG	Sec61a2
1257	ACGACTTACACTTTGAGCCC	Sec61b
1258	CAGCCGGGTCCAACGCCCAG	Sec61b
1259	TCTACACGGAAGATTCCCCA	Sec61b
1260	GCTTCCGGTTCCGTTGGGCT	Sec61g
1261	CAGGAGAGAACCGAGCCCAA	Sec61g
1262	AGCGTAGAGACACGTAGCTC	Sec61g
1263	GGACGCTTTATTTACAACCA	Sec62
1264	TGGCCAGCAGAAATGAGAGT	Sec62
1265	AACAGCCTGCGCCCACACTG	Sec62
1266	AACCCGATGACCCATCATGT	Sec62
1267	TGGCCAGAGAGGGAAGAGGG	Sec62
1268	GATCACGATGAGCCCCACGA	Sec63
1269	CTGTATGGACAGGTGAGTGG	Sec63
1270	GAAGGGGAGACTTAAACTGC	Sec63
1271	TAAGTTGACGAGGCAGACCA	Sec63
1272	GAAAACCCGGGGATGAACAG	Sel1l
1273	AGTGATATCTCCCTAACTGG	Sel1l
1274	GATGCACGCCAGCGGCACAG	Sel1l
1275	GCGGTCCTGTCACACTGCAG	Sel1l
1276	GCTGCTGCTCAGAAGCCAGG	Sel1l
1277	CAACAACAAGAAGTCCAAGG	Sell
1278	GGGAACGAGACTCTGGGAAA	Sell
1279	ACGGCTACAGGAATGAAGAG	Sell
1280	GGAGTGTGCCAACTTCGTGC	Sema3g
1281	GAGTTTTGACCAGGACAGGG	Sema3g
1282	ACTGGGGCTGGGACCAGGGC	Sema3g
1283	TGAGAACTTCCAGATGGAGG	Senp5
1284	TTTCAGGAGACTCCTTGAGG	Senp5
1285	GGATCTTTAGGTTCTAGGGA	Senp5
1286	AGTAGAGGCCAGCGTAGCGT	Ap2s1
1287	GACTCACTTCTACGAAGTTG	Ap2s1
1288	ATCCTTATCCAGAACCGGGC	Ap2s1
1289	GACCACATTGAAGCAGGCGG	Serac1
1290	AATGTTGGACACTCAGGTGG	Serac1
1291	TCAGAGGCTCACCACTGGCA	Serac1
1292	GGTGCTCATTACCATGCCAG	Serac1
1293	GCTGCTTTCACTAAGAGCCA	Serac1
1294	AATCAGCCTATACCGGGAGC	Serpina1a
1295	GGCTGATTGCAAAGTCTCCC	Serpina1a
1296	GTGCTGCTGATGGATTATGC	Serpina1a
1297	AATCAGCCTATACCGGGAGC	Serpina1c
1298	GGCTGATTGCAAAGTCTCCC	Serpina1c
1299	TACCTGAAATAGCAAGCTGC	Ap3m1
1300	TCTAGGCAGTAGTAATGTTG	Ap3m1
1301	AGGCTTAAAAGTGAACCGCT	Ap3m1
1302	TGGGTGGAAAGCAAAACAAA	Serpinb3b
1303	AGCTGCATGAAAACGAATCA	Serpinb3b
1304	TACACTGACTTCCACTCCTG	Serpinb3b
1305	GGACTTTCAGGGTGCTACAG	Serpinb6a
1306	GGGTGGTCGGCACAGAAGCG	Serpinb6a
1307	CAGCTGGCATGATGACGGTG	Serpinb6a
1308	GATGGTCCTGCTCCCAGAGA	Serpinb9b
1309	TACCTGAGATATCTGGACTG	Serpinb9b
1310	GTAAAATGGCATTTCCCTGG	Serpinb9b
1311	GAGAAAATGCTGCAGCCCAG	Sf3b5
1312	TGTAGGAGCAGTAGGAGTCG	Sf3b5
1313	CATCAGGTTGAACCGCACGC	Sf3b5
1314	TGCTGAGGAGGGCCAGGAGG	Sfta2
1315	TTGGAGCATGTCCAGAGCAC	Sfta2
1316	CTCCTCAGCAGCTCACACGC	Sfta2
1317	GGGAGAAGGCTGTGGAGCGG	Sgcb
1318	CAGGAGGACGATCACGCAGA	Sgcb
1319	GATTACACTTGTCATCTGGG	Sgcb
1320	GGTTACCTGCATAAGAAGGG	Sh3bp2
1321	GGAAGGCCTCGCTTAGGAGG	Sh3bp2
1322	GGAAGCAAGGATGTTTCCGG	Sh3bp2
1323	GCAGCCTGGCTGCTCACTGC	Sh3kbp1
1324	AGACCCATCGAAGACGGAGA	Sh3kbp1
1325	AGGGTTTCTGGTCTTTCAGG	Sh3kbp1
1326	TTGAAGGGTCCACTTTGCCG	Sh3rf2
1327	GAGGGAGCCCACCATGAAAG	Sh3rf2
1328	GGAAAGGAGGCTCCTTCCGA	Sh3rf2
1329	CAGTATCCGAGGCCTTCGGA	Sh3rf2
1330	GGGGAGATTAATGGCGTCAG	Sh3rf2
1331	GTGGAGGTGCAGCTGAGCGG	Shroom2
1332	TGTGGGGCAAACTGAGGCGA	Shroom2
1333	TGACAGTAGGATGAGGACGG	Shroom2
1334	GTAATGCTGTAGCAGTCTGG	Siah1a
1335	ATTCCCTCATGAATAGACCG	Siah1a
1336	CACCGAAAAGGCAGAGCACG	Siah1a
1337	TGTCTGCTTAGGGACAGCTC	Sirpb1b
1338	CTTCACAAATGATCTGAGAG	Sirpb1b
1339	CTGCTGGCTGATCTCCAGGG	Sirpb1b
1340	CTATGAAGAGCACATAACAG	Skint1
1341	GAACCCTCTAACAGGCCAAG	Skint1
1342	TGTATAGGAAACAAGCATGG	Skint1
1343	ACAGGTGCAATGGGATCCAC	Skint1
1344	CCTGTGCACCTGTACAGAGA	Skint1
1345	AGAGCTTCTGGGGAAAGACG	Slamf7
1346	ACATGTCAGATTGATTACGC	Slamf7
1347	GAGATCAGGAGAGAAAGACC	Slamf7
1348	TGTTAGCTGACAGAGGACAG	Slamf7
1349	GAATGTCACAGATCCATCAA	Slamf7
1350	AAGCCATCCCATGAACACAG	Slc15a5
1351	GAGTTGGTTAGACCATGCCA	Slc15a5
1352	GAAGTCCTGGTAAACCCTGC	Slc15a5
1353	GTAGAAAGGTTACCTTACGG	Slc20a1
1354	GGAAGCAGTAACAGCAGCTA	Slc20a1
1355	CCGGAACGGCTTGATAGATG	Slc20a1
1356	TGGTTGCACCGACAATACAA	Slc20a1
1357	GCTGCAGGACACCAGAGGCG	Slc22a3
1358	ATGCGCCTGGGACTTATCGG	Slc22a3
1359	GACACCAATAGTAGTCGGGC	Slc22a3
1360	ATGAACGAGCGAACCCACCG	Slc25a1
1361	GGTCATGACAAAGAATCGGA	Slc25a1
1362	GGGGATGGAGCCGTAGAGCA	Slc25a1
1363	GAAGACACACCTACAGGCAC	Slc25a35
1364	GACACCACTCACCATGGCAG	Slc25a35
1365	GAGTGGTGTCGCCATAGTCG	Slc25a35
1366	CAGAAGACCCACCTGCGAGG	Apoa5
1367	GACCAGGGCTACACTGGCGA	Slc25a45
1368	GGACCCCAGGGACTGTTCAG	Slc25a45
1369	AAGATGTTTGTGTAGCTGGG	Slc25a45
1370	TCAGGCACGGAAGAGCCTCT	Apoa5
1371	GCAGTTGAAACCCTACACGG	Apoa5
1372	AAACTGGAAAGAGCCGATCG	Slc2a3
1373	CTGGAATGATGGTTAAGCCA	Slc2a3
1374	CTTGTGGGGCACCTCGGACG	Slc2a3
1375	GCTTGCTGCAGTTGTCACAG	Slc30a4
1376	CAAGTAGAGGACGGCAGCGA	Slc30a4
1377	TCGGACGAGGTGAGCGACGA	Slc30a4
1378	AGTGGCAGGATTATCTGCAG	Slc33a1
1379	GTGACTTACCTAAAGCCCCG	Slc33a1
1380	AGGACAGCAGTCGGCAGCGG	Slc33a1
1381	GACCGGGCTCAGACTGGAGA	Slc34a1
1382	TGTGATCACCAGCATTGCCG	Slc34a1
1383	CAGCCTTGCAAACACCACCA	Slc34a1
1384	CCAGTCTGGTTCTAACGATG	Slc35a3
1385	AAATCTTGACAGGCACTTGG	Slc35a3
1386	GAATTACTAGGGAGAGCCAC	Slc35a3
1387	AGGCTGTGAGAACTGCCATG	Slc35a3
1388	GTATCTAGGTACCTGGTAAG	Slc35a3
1389	GAGAAGAACGTTGAACACGG	Slc35c1
1390	GAGCAGGGCATAGAAGGAAG	Slc35c1
1391	TGGGGAAGTCTACCATGCCG	Slc35c1
1392	AGGGGTGCCCTTCTACAACG	Slc35c1
1393	TACCATGCCGGGGCAGCAGG	Slc35c1
1394	GAAATCCCAAGTGCCGGAGG	Slc35e2
1395	CAAAGGTGATGGCAGCCCAG	Slc35e2
1396	GGTGTAGAACTGCAGTTCCG	Slc35e2
1397	TCAGCATGGATGAGAAACTC	Apoc2
1398	AGAGAATGGAAAACCCACAG	Slc35f3
1399	GTTGGTGGCAAACCACGTCA	Slc35f3
1400	AATTCCAAGAGACATCAGCG	Slc35f3
1401	GAACAGAGCAGAGACATCAG	Slc35f4
1402	GAATCTTCCGTGACCGACAG	Slc35f4
1403	GGGATGGCGGGACTATGGCT	Slc35f4
1404	GTCATCCTGATGTTGGGAAA	Apoc2
1405	CGCTTCCCTCAGAGGTCCAG	Apoc2
1406	GAAAATGCACCGATACACCG	Slc44a3
1407	CAGGAAAGGACAGCTGCTGA	Slc44a3
1408	AGGATGGCACACGTCCACAG	Slc44a3
1409	TGTACATGCAGGATTACTGG	Slc48a1
1410	GACGGTCCTCACTCTGATGC	Slc48a1
1411	TACCGAGCTGAAGCCGGAGT	Slc48a1
1412	GCTGCGCGGCTTCTTCTTCG	Slc48a1
1413	GAAGCCGTTGTGGATAGAGG	Slc4a10
1414	GAACATCTGGCACGTAGGGG	Slc4a10
1415	GCACAGGCTGGAGCAGACTG	Slc4a10
1416	ACTGCTGGAGAAGATCCCGG	Slc4a3
1417	GCAACCCTGGGCCAGAGCAG	Slc4a3
1418	GCAGCGGGTGCCCACTGACG	Slc4a3
1419	TGGAGTCGCTGATATTGTCA	Apol10b
1420	GCAGGGGCTCATAGCAGCCA	Slc52a3
1421	GTGACCTCCTGGATACAGGG	Slc52a3
1422	AAGGTGGTAAGATAGTACGT	Slc52a3
1423	GGTGTTCTCCCAATGACCAG	Apol10b
1424	GGAGCAGGGACAGAACGGAA	Slc5a1
1425	GCAGACCGCGATCATGCTGG	Slc5a1
1426	AGGAAGAATGCTACACACCG	Slc5a1
1427	GCAGGCACAGGAGCAGCCGC	Slc5a1
1428	GGGGATGGTCCTGGAGGGGA	Slc5a10
1429	GTGCCCAGGTTATTGTGCAG	Slc5a10
1430	CAGGCTCGCAGACACTCGGA	Slc5a10
1431	GGTGGTCGTAAGACCAGTCA	Apol10b
1432	ATGAAGACTGCACCAAGGGG	Slc5a4b
1433	GAAACTCAAGAAGAAGCTGG	Slc5a4b
1434	TATCTCAGGAAGCGCTTCGG	Slc5a4b
1435	GAAGTGTTGGCAGCTCCGGG	Slc5a5
1436	GCGATGCGGCCTGTGAGGAG	Slc5a5
1437	AAAATGTCCAACACGAGCAA	Slc5a5
1438	CACAGGCCAGGAAGAGCCCG	Slc5a5
1439	GGCTGGGAGCAGCATCCCGA	Slc5a5
1440	GGACAGAGCCACAGGCACGG	Slc5a8
1441	GGGCGCAGTGGTGGCCACAG	Slc5a8
1442	GCATCTATTACGCCTTCGCG	Slc5a8
1443	GGAGCACTGGAACAACAAGA	Slc6a13
1444	CGATGTAGTAGACATTGAGG	Slc6a13
1445	GGTGTCTCCCAGATGACCAG	Apol11b
1446	GCACCCCAGACAGATGGCAA	Slc6a13
1447	GACTTCTGTCACAGCGAGGA	Apol11b
1448	ACTGGAAGAAGCTCTGGGCA	Apol11b
1449	GTGAATCTCAGCCACCAGGG	Slc6a4
1450	AGAAAGGACAATGTAAGGGA	Slc6a4
1451	AGATCCTCCAAAACCATCCG	Slc6a4
1452	ACCATGGCTACCACTACTGG	Slc9a5
1453	TGAGTCAGCTCTTGATGCGG	Slc9a5
1454	GTGATTGACACGGTGCGCAG	Slc9a5
1455	GGAGACGCCTATCCAACCCC	Slco1c1
1456	GATAGGCGATGCCCAGGGGT	Slco1c1
1457	GCTCATCAACATTCCTGCAG	Slco1c1
1458	GGCGAAGCAGACGCACGGCG	Slco4c1
1459	GCAGAGACCTCCACCTGGGA	Slco4c1
1460	GGATTCGAAGAAGGCGGGGA	Slco4c1
1461	ACAGCCAACAATGAACAGGG	Slco5a1
1462	GCAGCGCAGCCAGCTCCGAG	Slco5a1
1463	GAAGACCAGGAAGGGAATGA	Slco5a1
1464	TGGATGGAGCAGAAGGGCTG	Slco5a1
1465	AGAGTCACTATAATGGCTGA	Slco5a1
1466	GCGGCAAGTGAAGATGGCCA	Slmap
1467	AGTACGGTTAGAACACCTGC	Slmap
1468	GCAGAAGTTACACATGGACA	Slmap
1469	GTGTGAAGACCAGCAAAGGG	Slmap
1470	GAAAGAGCTGGAGAAGCAAG	Slmap
1471	GCCGTAGTGACTGTTTCCCA	Slmo2
1472	ATATGGTCTCAGTAGATGAG	Slmo2
1473	TGTGGTTGGCGTCGACGTGC	Slmo2
1474	CAGCCTGCTGAGGATCCAGA	Smarce1
1475	ACAAGCCCGCAAGAGGCAAG	Smarce1
1476	TAAGGTCTGGGACCAAGTAA	Smarce1
1477	GGATGCAAGAGACAAAATGG	Smc3
1478	GGATTTACAAGATGAGCTGG	Smc3
1479	TGGCGGGCAACAGTGAACAG	Smc3
1480	GAAAGACGTTAGGAAGGCAG	Smc3
1481	GATGAAGAAAGGAGATGTGG	Smc3
1482	TCGGGGTCCACCAATTACAG	Smg1
1483	GTGCTCCTGGTACTCCACAG	Smg1
1484	GAAGAGCATCACTAAAGAGT	Smg1
1485	AGGGGAGAGCAGCGAACCCG	Smg5
1486	AGTGGGACTGGATATAGAGA	Smg5
1487	AAGGTGGGAAAAGAGGGCCA	Smg5
1488	GGAGCAGTTGAGGATAGAGG	Smg6
1489	GAGGGTGAACAGAAAAGCAA	Smg6
1490	GCTACACACATATTGTCCTG	Smg6
1491	CGATACAGCAAACTATGGGA	Smg6
1492	GAGGAAGATTCAGAGGCTGA	Smg6
1493	GGACGGCCTCGCCAAAGGGC	Smg6
1494	GGATTGCTGATAACCAGCCA	Smg7
1495	AGGTGCACTCACCATTGGAG	Smg7
1496	TACTCAGGTATACATGACCG	Smg7
1497	TGACTCAGGAGAGAAACCAG	Smg7
1498	GCTGGTAAAGATGTAAGGGG	Smg7
1499	ATCAACACCAAAACCACCCA	Smg7
1500	GCCGGGGATTCACTTCGCGG	Smg8
1501	TAGCAGCCTTGATATCGAAG	Smg8
1502	GCTCTTTCTCCGCCATGGCG	Smg8
1503	GGAGGCCCCTCCGCTGAAGG	Smg8
1504	GGGGCCTGTGGCTGGAACAG	Smg9
1505	GTGCAGAGATGAAGGAACGA	Smg9
1506	TCAGCATCCAGGAAGTCGGG	Smg9
1507	TGAGAAAGACAAAGCAGCGC	Smpd5
1508	GGTGTTGCTACCACTGGTGG	Smpd5
1509	GCGTTTGCCAGGAACAGCCC	Smpd5
1510	AGAGAGTACTCCTGAAACTG	Smpx
1511	CTGCCCAGCTCCCGGACGAA	Smpx
1512	TGGCTTCTTTTCCTCTGAGG	Smpx
1513	AAGAGGTGGCGGCTGCCCGG	Appl2
1514	GAATTCCTTGACCAGAACAG	Appl2
1515	GATAGGCTTTGCCCACGGAC	Appl2
1516	GCCACAAACAGGGTAAGGAG	Snrnp35
1517	AGGGAACGGGATCATGACAG	Snrnp35
1518	CGATGCTGCCAGCTTTAAGC	Snrnp35
1519	AAATCCTGCAGAAGCCAGGG	Snrnp40
1520	GAGACCAGGAACATCTCAGG	Snrnp40
1521	TAAGGGCCCGGAGCTACCCC	Snrnp40
1522	AAAGATGTCGGACACCGCAG	Snx12
1523	AAGGCTTTCCCAGGCAGTGG	Snx12
1524	TCGTAGTACCACCACTGCCT	Snx12
1525	GGATCCACCATAAACTGGGG	Aqp4
1526	ACAGAGCTGCGGCAAGGCGG	Aqp4
1527	GTGGCCAAAGCACTGCACCA	Aqp4
1528	AATCCTCCAACCACACTGGG	Aqp4
1529	GAGGATGCCGGCTCCAATGA	Aqp4
1530	GAAGTTCACTGTTCAAACCA	Snx32
1531	GTGGAAAACGAAGAGTACGC	Snx32
1532	CAGACTGGGCAAAGTGAGGG	Snx32
1533	GCTGGGAGAGGAGCAGGAGA	Soat2
1534	GGTGCGGTAGTAGTTGGAGA	Soat2
1535	GCTTCGGAGGAGAGAAGGGC	Soat2
1536	GATGGTAGCACGCAACCAGG	Socs1
1537	GCTGCTGGAGCACTACGTGG	Socs1
1538	GATGCGCCGGTAATCGGAGT	Socs1
1539	GCAGCACTCTAACTCACCAG	Sorbs2
1540	AGAATGGCTGGCAAATGGCC	Sorbs2
1541	GAGAAGGAGCAACAGCACAG	Sorbs2
1542	GTAGCTGCAGGACCAGGTCC	Spast
1543	GTTTGATGACATAGCCGGGC	Spast
1544	TGTGTCCTTACCAAATGAGG	Spast
1545	GGTACAGATGGCAAAACGGG	Spata21
1546	GAAACACAGATCATGATCTG	Spata21
1547	CATGAAGTGCCTCCTGGAGG	Spata21
1548	GCGGTGAAATGGAATTCCTG	Spata3
1549	TAGAAGGATCACCATGAAGA	Spata3
1550	GGAACCTGTAGAAGGTGAGA	Spata3
1551	GTGGACTCCTGGCAAGGCTG	Spata3
1552	GCTGCACAGGAGCAGGAGCG	Spata3
1553	GGACATCAAAGATTCGGCTA	Spata3
1554	GCTGTATCTGGGGAGGACAG	Spata7
1555	GGAGTTGGCACGGTGTGAAA	Spata7
1556	GCATGGGACAGTATTCAAGA	Spata7
1557	TGCCCGTCAGAAGAAAGCAG	Spats2l
1558	GCAAGTATGACGAGGAGCTG	Spats2l
1559	GAAAGCAGCAAACCCCAAAA	Spats2l
1560	CGAGGGGCACGGACAACCCC	Spcs1
1561	GCGGATGTCTCCGAGGGGCA	Spcs1
1562	CCCTTGTCGATGGCGCGGGG	Spcs1
1563	GACATCCGCTTCCGGGGCCA	Spcs1
1564	CGGCGGTAGATAGGCCATGG	Spcs1
1565	TCGCAGGGTGGGAGAAGCGG	Spcs2
1566	GGGAGACAAGATGGCAGCGT	Spcs2
1567	AAGTTACCTTTTGAGGCTGG	Spcs2
1568	ATGGCAGCGTCGGCGTCGCA	Spcs2
1569	GGAGTTCGCGCGCGACAGGA	Spcs3
1570	CTTCTCGCTGAGCGTGATGG	Spcs3
1571	GTGATGGCGGCGCTCACCTT	Spcs3
1572	CGAGATGGTCATGGCAGGGG	Specc1l
1573	GGCTGATCTCCAGACTGCAG	Specc1l
1574	AGATCGGTGATCTAAAGCGA	Specc1l
1575	GCTTGGAGTGACAGATGCAG	Specc1l
1576	GCATTGGCAAGAGAATATGG	Specc1l
1577	CGTCCTTCATTACTCTCAGG	Speer4b
1578	GAAGAGGTCTCCCAGGACAG	Spns3
1579	GGCACTGCTCCTGGAAGCAG	Spns3
1580	CAGAGCCAGAGCCTGAGCCA	Spns3
1581	GGCTCTTGGTAAAGAAGCTG	Spo11
1582	GCCCAGGAGGAGTCTGCACG	Spo11
1583	GTTGCCAGCAATCAATCCCT	Spo11
1584	GGTGACCACCATCCCCACGG	Arf6
1585	GCAAATCACTGCCAATCTCA	Spp1
1586	TGGAGACCATGCAGAGAGCG	Spp1
1587	TCTCATCAGACTCATCCGAA	Spp1
1588	TAATGCGGTGCAGCTCCTGG	Arf6
1589	CAAAGAAGAAGAACATGACG	Sppl3
1590	GCCCCACATTGGGTCCCAGG	Sppl3
1591	AACTACAAGAAACAAGCCAG	Sppl3
1592	CTACCACGAAGATCAGACCC	Arf6
1593	GGGTTAGTTGTGCTCCTCGC	Sprr4
1594	TCTTGACATTTGGTAGGAGG	Sprr4
1595	ACCACAAGCCCAGCAGCAGC	Sprr4
1596	TGGGAGCCTCAAGTCTGTGG	Spsb4
1597	GAGACACGCGTGGAACCCCG	Spsb4
1598	GGGCACGCTCAGCTTCATCG	Spsb4
1599	GCAGTGGATCACTGAGAAGG	Sptan1
1600	GGAGAGACGACAGCAAGTCC	Sptan1
1601	TAGAGAGCTCCTTGAAGCGG	Sptan1
1602	TGGCAATGAAGACTCCCCGG	Sptlc2
1603	TGAGAGCAATCACTTCAGGA	Sptlc2
1604	GAGATGCTGAAGCGGAACAT	Sptlc2
1605	CTGGAGACAACAGTGACCAG	Sqrdl
1606	GCAGGAGATCATTCGGGAGA	Sqrdl
1607	GAAGACATGGAAGGCCCTGC	Sqrdl
1608	GAAGAAGAGCTCCCAACAGG	Srbd1
1609	GGACCCTGCTGGAGAACCCG	Srbd1
1610	CAGATTCTGGCCATTAACCG	Srbd1
1611	GACAGACGGAGGCAGAGCTG	Srcrb4d
1612	CCAATGGATGGCCTTTCCGA	Srcrb4d
1613	GCACAACTGCGGACACCACG	Srcrb4d
1614	GAACCTGGCCGAGTGTGCGG	Srebf2
1615	AAACCTGCTAGAAAGAGCGG	Srebf2
1616	GGGCTCAAGACCCGCTGTGG	Srebf2
1617	GAGCGAGATGGAGCTCGGCG	Srf
1618	GGGCCGCGTGAAGATCAAGA	Srf
1619	GTGGTGGGGTCTGAGCGGGG	Srf
1620	GTGCTCAAGAGTACAGGCAG	Srf
1621	TGAACACGCTGCCCGACGAG	Srp14
1622	TGTTGTGTTGCAGTTCCTGA	Srp14
1623	TGAGAGCCACGGATGGGAAA	Srp14
1624	AGAGCCTGGTCAGCTCCGTC	Srp14
1625	GCGGCACTTCTGGAAGAGCC	Srp14
1626	CCACCTGTCCTGGTCGGCCG	Srp19
1627	GATCCGTCTCCCCTCAGCTA	Srp19
1628	GTACAGCTCAAACAGGAAGA	Srp19
1629	GGACAGTACAGATGGTGCCA	Srp54a
1630	AGAATCCAAAGAGTTGCCCG	Srp54a
1631	AAAGCGTGGACACCGACTAA	Srp54a
1632	GGACAGTACAGATGGTGCCA	Srp54b
1633	AGAATCCAAAGAGTTGCCCG	Srp54b
1634	AAAGCGTGGACACCGACTAA	Srp54b
1635	GGACAGTACAGATGGTGCCA	Srp54c
1636	AGAATCCAAAGAGTTGCCCG	Srp54c
1637	AAAGCGTGGACACCGACTAA	Srp54c
1638	GCTGAGAAGCAGATCCCGGG	Srp68
1639	CACGGGGAAGAAAGTAACGG	Srp68
1640	CTTGTGTGAGAGCAACCGGG	Srp68
1641	GAGACGCCCTCCAAGCCGTG	Srp68
1642	TATCAAGGACAAATGAGCAG	Srp72
1643	TCAGTGACCTAGAACAGCTG	Srp72
1644	AAGATGGCGAGCGGCGGCAG	Srp72
1645	GAGGAAAACAAACCTGTCAG	Srp72
1646	TGCAGCGACTCACCTTCATG	Srp9
1647	GGCCGAGAAGCTCTACCTGG	Srp9
1648	CTGGGAGGAGTTCAGCCGGG	Srp9
1649	TACGGGTGGTTCTCAAATAC	Srp9
1650	TAAGTCGCATTAACTGACTG	Srp9
1651	AGCATGTCTACACGACGCTG	Srpr
1652	GAAGCATGGTGGCCGTACGA	Srpr
1653	CCAAAGAGGAGCTGATCCGT	Srpr
1654	GACGCTGCTCTCCGTGGCGG	Srprb
1655	TCAAGCTCTCATGCCCGGGG	Srprb
1656	TGGACAGTGCGGCGTTCCAG	Srprb
1657	GTAAGGCTGGAAGGCGCCAC	Srprb
1658	GTAAGGAGTCGAGGTAAGGC	Srprb
1659	TCACTGTCTGAAGATGGCGG	Ssfa2
1660	GAACGAGTCCCTGCAAGCCA	Ssfa2
1661	GGTGTACCCTCATATGACAG	Ssfa2
1662	GGTGTCATCATCACACGTGG	Ssx2ip
1663	GGAGACACAGAACTTGAAGC	Ssx2ip
1664	GGAGAACGCGGAGCTGAAGA	Ssx2ip
1665	CAAACAGCATCAGGAAACAG	Ssx2ip
1666	GCAGTTGGAAACGTCCAGGC	Ssx2ip
1667	GGACTGACAAAACAGAAGCC	Ssx2ip
1668	AGTGGGGAAAGCTGACTGAA	Ssxb10
1669	CCAAAAGCCCCTCCTTGCCG	St3gal2
1670	ACAGTGCCGGCGCTGTGCTG	St3gal2
1671	GAATGTACTTGAAGAAGGCT	St3gal2
1672	GAGCCAGGAGAAAGTGGCCG	St6gal1
1673	AGAACTTCAGAACCAAGGCT	St6gal1
1674	TAAAGTGTCCTACAAGGGGC	St6gal1
1675	GAGTTGTACCACCACAGGCA	St6gal2
1676	AAGCTGCTCCACCCAAGGCG	St6gal2
1677	TGAAACCACACTTGAAGCAA	St6gal2
1678	GTGGGTCCCCAGGCCAAGGG	St6gal2
1679	CAGGAAGGCTCTCGACATGG	St6gal2
1680	GAGGCAGGCTGCTGGAGCAG	Arhgap17
1681	TGTGTGGTCTCACTTTGCGA	Arhgap17
1682	AGATACCCTAAAGGAAGAGA	Arhgap17
1683	AAGAAGGGCGGCTCAGGCAG	Stac
1684	GGAAAGATTCAGGACAGGGT	Stac
1685	GGGGTGCAGGCCAGCCTTGG	Stac
1686	GAAGGTCCTGCCACAGGAGA	Stil
1687	ATTGTGCTTCTAATAAGCGC	Stil
1688	ACTGCTTTAAGACAGAGCAG	Stil
1689	GCTGCAGCTGACCCATGAGG	Stim1
1690	GACTCGGCATAATCACCTGA	Stim1
1691	GAGGAAAGCAGAGAAGGAGC	Stim1
1692	TGACAATCTGGAAACCGCAG	Stim1
1693	CCACCAAGGAGTGGATGCCG	Stim1
1694	GTGGGCCAGGATGGACGTGG	Stk11
1695	GCAGGGAGATCCAGCTGCTG	Stk11
1696	GGTACGAGCGCCTCAGCCAG	Stk11
1697	GGAGATGCTGGACAGTGTGC	Stk11
1698	CCAGGCCGTCAATCAGCTGG	Stk11
1699	CTGGAATACCTACACAGCCA	Stk11
1700	GAGAGTAAGCCATGAGGCGA	Stk16
1701	GACACTTCTACGCCCTGAAG	Stk16
1702	CCAGGAAGAAGCCCAACGAG	Stk16
1703	GGATGTTGGGATGCTGGAAG	Stk16
1704	GCTTACTCTCTGAAAGAACG	Stk16
1705	GAAGTACCTTGAGAAGGTGG	Stk36
1706	TAGAAGCCACAACTATACGG	Stk36
1707	AACAAGGCTTCCCAGAGCCG	Stk36
1708	ACAGCATGTGAACTAGCCAA	Strada
1709	ATTCAGGCCAGGGTTGGCGA	Strada
1710	GAAGGTTCGGTGGTAGGGGT	Strada
1711	GGAGAGCTCCCACAGTGAGG	Stt3a
1712	GCTCCGTCACAATACTCCAG	Stt3a
1713	GGTGAAAGAGGAGAAAAGCG	Stt3a
1714	CCACCCACTATTCTTCCCAG	Stt3b
1715	GTACATATCTCGGTCAGTGG	Stt3b
1716	GAAAAGGGAAAACCCACCTG	Stt3b
1717	GAGCAAGAGAAACCTGAAGA	Stt3b
1718	GGCCAGGAAGAGGATGGTGA	Stt3b
1719	GAAGCACATTGAGGAAGATG	Stx3
1720	CCTGGGACTTTCGTATCCGA	Stx3
1721	CCTCTCCCGGAAGTTTGTGG	Stx3
1722	GTAGATCATCTGCACAGCAA	Stxbp5l
1723	ACGGCCAGTACGAATGCCGC	Stxbp5l
1724	GAAAGGCTGGTAATTTGCTG	Stxbp5l
1725	GCAGCGTAGTCTGCGGCCGG	Sucla2
1726	GGGCGAGCTTACCTGGGCGG	Sucla2
1727	GGATGTTGTGATAAAGGCAC	Sucla2
1728	GCATCACCTCAAACATCCAG	Arhgap31
1729	GAAGTTGGTAAGCCTGGAGG	Arhgap31
1730	GAGTGGCACAGACACGGCGA	Arhgap31
1731	AAGGTGATGGAGGAGAGCCA	Arhgap31
1732	GAGGAGGGACGATCTCGGGC	Arhgap31
1733	TCAGCAATGCTCCAAAAGAG	Sult1d1
1734	GTTTTCACTATTCGAGGAGA	Sult1d1
1735	GGGATGCAGAGAAATGTAAA	Sult1d1
1736	GGAAATCGTCATAGCTCCGG	Arhgap33
1737	GTGGACAGTAACCTCAACTG	Arhgap33
1738	GGAGCTGGGATGCCACACAG	Arhgap33
1739	GACTTTCTGGGCCAAACGGA	Sun5
1740	GCCCCGGACGAGGAACATCG	Sun5
1741	GCTGCGCGTAGTTCCACAGT	Sun5
1742	GAAGCGAAGAGCACATCAGA	Supt16
1743	GCTATCAAAGAAAGCAAGAG	Supt16
1744	ACTGGCAGCACAGCTCAACG	Supt16
1745	ATGGTGTGTGGGAATGACGG	Susd5
1746	AGGCTCTCCTGCAGGAGCAG	Susd5
1747	ACTTAGCACCAGGAACTGGG	Susd5
1748	GTCACCGGGGTGGTTTGGGG	Svil
1749	GAAGTCTCGCCGTTACAGGG	Svil
1750	GTGGGAGCAAAGGAATGCCG	Svil
1751	CAGGAAGCCCTCCATACTGG	Syn3
1752	CATCCCCGGCCACAGAGAGG	Syn3
1753	TGTCAGACAGCCGCCTCCGG	Syn3
1754	GAGTTTGGTGGAAGAGACGG	Syne2
1755	GCAGCCACGCTCACAACCTC	Syne2
1756	AAGCTCAGGCAAGATGGCAG	Syne2
1757	GGAGAAGAAGCTGAAAGCGA	Syngr3
1758	GGAGGGAGCATCCTTTGGCG	Syngr3
1759	AGTGGCAACGAACAACGCCA	Syngr3
1760	GATAGGAGCGGCCAGGGAGG	Syt10
1761	GCCCACGCTAAAGTCGACGC	Syt10
1762	CAGCAGTTGGCAAATAGCAA	Syt10
1763	CGAAGGTCCAAGCCAAGCTG	Tac2
1764	GTGCTGAGCAAGGCTAGCGT	Tac2
1765	GGCTGTCCTCGCCCTCAGCT	Tac2
1766	GGCTACCAGCTGGTAGACGG	Tada2b
1767	CCAGCAGCAGCTGCTCCTCG	Tada2b
1768	ACGGCGGACGATTCACACTC	Tada2b
1769	CAAGAGAGAGAAGGCACCGA	Taf1a
1770	AAGAAGAGTGGAAGTCTAGG	Taf1a
1771	AAGCCCTGCTGAAGCACCAG	Taf1a
1772	AAGCTGCTTCAGGACCTCGG	Taf1c
1773	CAGCTGGTCTACCCTAGTGG	Taf1c
1774	GGGGAGCAGATGGCAAGCCA	Taf1c
1775	CCGGAGGAGGACCCTGCAAG	Taf8
1776	ATAACTACCATCTGGCCCGG	Taf8
1777	CCGGTTCTGCCCTGCAGTGA	Taf8
1778	TTGACTCACAGGTGTCCCGG	Tagap1
1779	AGACGCAAAGGAAAACAACA	Tagap1
1780	TTTAAAGGCTGAACTCAGAG	Tagap1
1781	GGAGTCGTCAGAAGTGATGC	Tagap1
1782	CAGGAACTCCAGAAATGCGC	Tanc2
1783	GCTGCTGCAGCATACCCCAG	Tanc2
1784	GCCTCATCTACAGATGGAGG	Tanc2
1785	GCAGCTGCCCACATAGACGG	Tango6
1786	AGAGAGAAAAGAACACCCGG	Tango6
1787	AAGAAAACCACCAGGACCTG	Tango6
1788	GGAGTGGCAAGGCAGAGCAA	Tap2
1789	TTACACGACCCGAATAGCGA	Tap2
1790	GGGGCAGGTCCAGCAGGGAG	Tap2
1791	AAAGGAGATCCAGGATGCAG	Tap2
1792	GGTACAGCAGGAAGGAGAGC	Tap2
1793	GCTGTGGAGGAGATCAACAA	Tas1r3
1794	TGACTGCGTGGACTGCAAGG	Tas1r3
1795	ATGGCCTCTCACCCAAGGTA	Tas1r3
1796	GAAGATGCTGAAGACAACAG	Tas2r135
1797	CAGGTACTGGATGTGGCAGG	Tas2r135
1798	GAGGAAGAAGAGCCTTGAAA	Tas2r135
1799	GCTTGGCAGTACCTGTCGGG	Tbc1d10a
1800	GAGATGTTCGTGTCCCGAGG	Tbc1d10a
1801	GTGGGTTCGCAGGGCGCCGA	Tbc1d10a
1802	AGAGTCATCTCAAGAAAAGG	Arhgef28
1803	GTATCTCCCGGGGATTCGGA	Tbc1d2
1804	GGGTGGCGGGAAGTGCAGGT	Tbc1d2
1805	AGATCGCTGAGCTGAACCAG	Tbc1d2
1806	GCAGCTGGACCACAGCACGG	Arhgef28
1807	GGAGGAGGAGGAGGATGCAA	Arhgef28
1808	CCAGCCCTGGACAATGCACC	1700066B19Rik
1809	GCGATGATGGCAGCAAGCAG	1700066B19Rik
1810	AAAATGCTCGCAGCCTCCGG	Tbk1
1811	GACCCTTCGAGGGGCCTCGG	Tbk1
1812	GGAGTACAGAAAGCAGAAAA	Tbk1
1813	GCTGGCGATCTGCATTGTGC	1700066B19Rik
1814	AAGAAAACCCAGCTAAGCAA	Tcam1
1815	GTTCTTGGTCACCCTGGAGG	Tcam1
1816	TACCTGAAACAGCTCCTCGG	Tcam1
1817	GAGCTGTCTCAGCTCTGTGC	Tchhl1
1818	GAAGATGGGCAGCTCCCAGA	Tchhl1
1819	TGAGGGAGAGGAGGTACAGG	Tchhl1
1820	GGGGTCCTAGGCGACAGGGA	Tctn1
1821	GGATTAGCAAAAGACAGTGC	Tctn1
1822	AGAGATGACGTGAGAGGCGA	Tctn1
1823	TGTGCAGATCAGAACCCCGC	Tctn1
1824	GGCAGCCACATAGTCAGGGA	Tctn1
1825	TCGGCGATCAGTAGCAGCGG	Arid1a
1826	CAGCAGCAGCAGCGACGGGG	Arid1a
1827	GCGCTGAGCTCCCCGAGAGG	Arid1a
1828	GGAGTGGTAGGTGCAGGAGA	Tectb
1829	GGGGATGTTCTGGAACCGGA	Tectb
1830	GACTTACAGTGTAGAAGTTG	Tectb
1831	GAGGGAGGCAGAGACGGCCA	Tef
1832	GGACTCGCCATCGTAGGGGA	Tef
1833	GCAGCAGGTTCTGTGCCAGG	Tef
1834	GAAAAGGCTGGTGAAAGTCA	Arid4a
1835	GCAGGTGATGACGATGACGA	Arid4a
1836	TGTTTCTCAAGGAGGAGAGG	Tex101
1837	GCTCTTACTGGCCAAAACGA	Tex101
1838	GCAGGGAAGAGACTGAGAGC	Arid4a
1839	GGTTTGACTCACCTGGCAGT	Tex101
1840	GAAGCAATACAAGATGGCCA	Arid5a
1841	ACACGTTCTTCCAGAGGCGG	Arid5a
1842	ATGATCACAGAAGAACCCGA	Tex35
1843	AAAACCAACGAGGAATCCAC	Tex35
1844	TCAGATGCCGCACATATGGG	Arid5a
1845	TAAAGACCAACCGCAATCAG	Tex35
1846	GGCTGTACCTCTCATAGTGG	Arid5a
1847	GAGGCTGTCCCTAATAGAAA	Tex40
1848	CAGGTCCTTGGAGCATGGGG	Tex40
1849	GAGGCTATACTGACCTAAGG	Tex40
1850	AGGAGGATGATAGTCCGCGG	Tfap2e
1851	GTGCAGGAGCCGGGGAACCG	Tfap2e
1852	CGGGTCGAGACCCAGAGCGC	Tfap2e
1853	GCACTGGAAGGCCCTGGTGG	Tfe3
1854	GCAGTTTCAGGGGCAGGAAG	Tfe3
1855	AAGACCTGGAGAGCCGGCAG	Tfe3
1856	GCTAAGCAACAGACACACAG	Tfpi
1857	ATGAGTGACTACGTAACTGA	Tfpi
1858	AGATTTCTGCTTCTTGGAAG	Tfpi
1859	AAGTAATCGTTAGTATCCCG	Thada
1860	GATGTGCCGTCCATCGGCGA	Thada
1861	GCTTGCTGAAGCTAAAGGGC	Thada
1862	GAGTGGTCACGATGGTGCGC	Thbs1
1863	GGACTCCATTGTGAAAGCAG	Thbs1
1864	GACACGGACATGGATGGGGT	Thbs1
1865	GCAGTCTCACACTCACCGTG	Arl14
1866	GATATCTCGGAGCCTGACAG	Thoc2
1867	CACCGGACATAACAAAGAGG	Thoc2
1868	GCAACTCTGTATAAAGACGA	Thoc2
1869	TCAAGGGCTGATGTACGTGG	Arl14
1870	GGAGAAGATGCGAACAGTCT	Arl14
1871	CATGGCGGCAGTCCAGGCGA	Thy1
1872	GATATAGGGCTGGTTGGAGA	Thy1
1873	TAAGGACCTTGATATAGGGC	Thy1
1874	GGACTGAAAATAATTCCACG	Tiam2
1875	GATGGTGTTTGACCAGCTGG	Tiam2
1876	GTACAGAGGGTTCTAGAGCG	Tiam2
1877	AGGGTGCTCAGTTCTCCCGG	Ticrr
1878	GAAACAGTGCTGCCATGTGG	Ticrr
1879	TGAGGTGGAGCGCATAGTGG	Ticrr
1880	GTGATGCTAAGCGTGTCCCA	Timp2
1881	CGCCTGTTGCGGGTGCACCG	Timp2
1882	GAGCAGCTGCAGGCGTCGGC	Timp2
1883	GTACATGTTCAGGACAGCAG	Tinag
1884	GATGATGTTATTACTTGCGG	Tinag
1885	GGCACACTGAGAGGAGCACG	Tinag
1886	CAACACCCTCAACCATGGGG	Tle4
1887	GCAACAAGTGGTGCAGGCTG	Tle4
1888	CAGGAGTAGAATTACTGCCA	Tle4
1889	GAACCCCAGACCTCCTGGAG	Tle6
1890	AGGAAGCCTTGACAGAACTG	Tle6
1891	TTAAACCAGAACCTCAGCCC	Tle6
1892	CAAGACAGAAAACCCATCGT	Tlr6
1893	AGAGTTTTGAGACAGACTCA	Tlr6
1894	ATTCTTTTGGCCCCGACCGG	Tlr6
1895	GGAGCGGTGAAGGTGACCCC	Tlr9
1896	GCAGCTTCAGGCTCTTGGGG	Tlr9
1897	GGTCCTCCAGACACAAGCGT	Tlr9
1898	CAAGTGTGAGGACCTCAGGG	Tm2d1
1899	GAGGATATTGTCCCACCCTG	Tm2d1
1900	CACCTAAGGCAGGATATCCG	Tm2d1
1901	ACAGTCCTGCCGGCTAGGGG	Tm6sf2
1902	GGAGCAGCCAGGGAAGGCAA	Tm6sf2
1903	TGAAGAGCGCTGCAAAGATG	Tm6sf2
1904	GGTTACCCAAACCCAGCTGG	Tmcc3
1905	GGGGACATCGAAGTTGAGGT	Tmcc3
1906	GGAAATCCAGGATGCCATCG	Tmcc3
1907	GAGGGCCAGGCCGGGAGAGT	Tmed10
1908	GGAGATCCACAAGGACCTGC	Tmed10
1909	CAGCAACAGAAAGAGCCAGG	Tmed10
1910	GGACAAGACATGGAGACAGA	Tmed2
1911	GATGGGCCTCATCTTCGAGG	Tmed2
1912	CAGCATCGACGCGCACGCCG	Tmed2
1913	GAGGCCCATCTTGGTGCCGG	Tmed2
1914	CGAGGAGTGCTTCTTCGAGC	Tmed2
1915	ACAGATCTGGTGCTCACCAG	Tmed9
1916	GGTTCACCTTGACATCCAAG	Tmed9
1917	AAGTTCTCCCTCTTTGCCGG	Tmed9
1918	AACTAGTGCACCCCGTGTTG	Tmem126a
1919	GATGTTTCCCCTCTGTGGGA	Tmem126a
1920	AGTCAGGTTCAGGTAACTGA	Tmem126a
1921	AGAGGCGCTGTACCTCATGA	Tmem163
1922	ACGCCAGAGGACAATGGCCG	Tmem163
1923	GCACAGCCAGTACGCTGCAA	Tmem163
1924	AGCACGAGCAGCCTTCGCGT	Tmem165
1925	CCGGCGGCTCCTGGTTCCGA	Tmem165
1926	CCGGCTGACTGTGCTGGCCG	Tmem165
1927	CCTGGAGGTCAGTTTGGCGG	Tmem2
1928	CGGGACACTGGAGTTACACG	Tmem2
1929	GGAGATGTAGATTCTAAAGG	Tmem2
1930	GAGGTGGAATAACCTCATAG	Tmem206
1931	ACAGGAACTGCACCACTCAG	Tmem206
1932	GCAGGCAGACGAACGAGACA	Tmem206
1933	GCTGCTTGAGATGCTCACGC	Tmem216
1934	GATGCCCCTTGGCATTAGTG	Tmem216
1935	GCAGTAATACCTGGAGAAGG	Tmem216
1936	TGTTCATGATAGCTTCTAGG	Tmem216
1937	AGCTTCTAGGCGGAGCACGT	Tmem216
1938	GACAGCGGCCACGCAGACGA	Tmem229b
1939	CATACGCTCCACGATCAGGA	Tmem229b
1940	CCCAGGGACAGGCGTTGAAC	Tmem229b
1941	GGAGGTGCCATAGATGAAGA	Tmem229b
1942	TGGCACCTCCATCCTGATCG	Tmem229b
1943	CAACGAGACAGCGCTGTCAG	Tmem229b
1944	GGGAGAGTCCTTGTATGCCT	Tmem254a
1945	GCTTGCTTGGCTAATTCATG	Tmem254a
1946	GCATAAAACCAAGGCATACA	Tmem254a
1947	TAAAGGAATCACAGACGTCC	Tmem254a
1948	GGGAGAGTCCTTGTATGCCT	Tmem254b
1949	GCTTGCTTGGCTAATTCATG	Tmem254b
1950	GCATAAAACCAAGGCATACA	Tmem254b
1951	TAAAGGAATCACAGACGTCC	Tmem254b
1952	GGGAGAGTCCTTGTATGCCT	Tmem254c
1953	GCTTGCTTGGCTAATTCATG	Tmem254c
1954	GCATAAAACCAAGGCATACA	Tmem254c
1955	TAAAGGAATCACAGACGTCC	Tmem254c
1956	GAAGTACCACAGTCAGGTGA	Tmem258
1957	AGGAGCTCGAAGCCATGAGT	Tmem258
1958	ATCGCGTGTGTACTTGGTAG	Tmem258
1959	AAAGATAGAGAGGACCACCG	Tmem30c
1960	GCTAAATCTATCTGCCTCGG	Tmem30c
1961	GAAGGATGATGCCTATAGAG	Tmem30c
1962	CCAGCCCCTTTGTAAACCAG	Tmem56
1963	TATGGAGGCGAGCACCAAGG	Tmem56
1964	ACCAAGGCGGCCGTCGGCAG	Tmem56
1965	AACTAACAAAGAGTGGCACG	Tmem56
1966	CAGGATGTAGCCAGAAGAGG	Tmem71
1967	AAATGTAGTAGCCATTGGTG	Tmem71
1968	TACTTACCTAGCACAGGAGG	Tmem71
1969	GCTCAGGCCTGCGCTGGCAG	Tmppe
1970	AGCCTGGCGCAGCGGTAGGG	Tmppe
1971	GTCACGGCCACTGCCAGCGC	Tmppe
1972	TCAGAGTAGCTCCACATCGG	Tmprss11c
1973	AAGGTGTGGCAAGATTACCC	Tmprss11c
1974	AGAGGTCACAAAGTAGCAGG	Tmprss11c
1975	GCCAGCCATCGAGAAAGCCG	Tmx2
1976	TCACCCAGTCAAAGTCACAC	Tmx2
1977	TCTCTGTGTTCCAGTCACTG	Tmx2
1978	TGTTTCACCTACCTCAGAAA	Tmx2
1979	GCAGATAGTCCCGGAACGTG	Arpc2
1980	GCTCTAGAGGAGGTTCCCTG	Arpc2
1981	GTGTCTTTCAGCTCTAGAGG	Arpc2
1982	GATGGTGTTGTCTCGAGCAG	Arpc2
1983	CAAGCCTGCGAGCAAACAGG	Arpc3
1984	GCCCAGGCTCAGCACCAGCG	Tnfsf12
1985	GGAACTGAATCCCCAGACAG	Tnfsf12
1986	GGTCAGGTGGTATCTCGGGA	Tnfsf12Tnfsf13
1987	GCCCAGGCTCAGCACCAGCG	Tnfsf12Tnfsf13
1988	GGAACTGAATCCCCAGACAG	Tnfsf12Tnfsf13
1989	GGTCAGGTGGTATCTCGGGA	Tnfsf13
1990	GGGCGTACCTCCAGCAGCTG	Arpc3
1991	CCTTTGAACTGGCTTCGGAG	Arpc3
1992	GAAGCTGTCGGTCAATGCCC	Arpc4
1993	TCTCATCACCAACTTCCACA	Arpc4
1994	GGAACGACACAACAAGCCAG	Arpc4
1995	TCAGAGGAGGCCCAAGAGGA	Tnnt3
1996	CTACAGCAGCTACCTGGCCA	Tnnt3
1997	AGGCAAGAAACAGACAGCCC	Tnnt3
1998	GAAGTGGTGGGACACACCCA	Tns1
1999	CAAGTGACCAGTGCCCACTG	Tns1
[truncated: 2,723 more rows]
